# Supplementary material for: Genome-Wide Analysis of Targets for Post-Transcriptional Regulation by Rsm Proteins in Pseudomonas putida
Source: PubMed Central journal article supplement (PMC7937890; doi:10.3389/fmolb.2021.624061), 2021-02-22
Supplement: datasheet1.pdf [file datasheet1.pdf]

## SUPPLEMENTARY MATERIAL

### Genome-wide analysis of targets for post-transcriptional regulation by Rsm proteins in *Pseudomonas putida*

Óscar Huertas-Rosales, Manuel Romero, Kok-Gan Chan, Kar Wai Hong, Miguel Cámara, Stephan Heeb, Laura Barrientos-Moreno, María Antonia Molina-Henares, María L. Travieso, María Isabel Ramos-González, Manuel Espinosa-Urgel

**Tables S1.** Targets of Rsm proteins in *P. putida* KT2440 above the indicated cutoff parameters. Start and end genome coordinates for each RNA species in the different biological replicas, and the average fold enrichment values are shown, along with the loci covered in each case. The number of targets indicated in the Venn diagram in Figure 2 is the number shown in square brackets in boldface, after removing redundancies (see notes). Loci orientation is indicated by > (+strand) and < (-strand). When the target includes sequences corresponding to more than one locus, the ones with the longest overlap are shown in boldface. Targets specifically mentioned in the text are shown in red. When long intergenic sequences are included, these are indicated in parentheses.

Colors indicate common targets as follows:

|       |
|-------|
| A+E+I |
| A+E   |
| A+I   |
| E+I   |

Notes:

- a: 1 target in RsmE and RsmI; taken as 1 target in the Venn diagram
- b: *ISPpu8* and the adjacent intergenic region are considered as 1 target in all cases
- c: when 2 targets correspond to the same gene, they are taken as 1

| RsmA; -10logPval > 130; fold enrichment ≥ 2.15 |        |        |        |                   |                                  |
|------------------------------------------------|--------|--------|--------|-------------------|----------------------------------|
| RsmA1                                          |        | RsmA2  |        | average Fold enr. | 245 [241] targets                |
| start                                          | end    | start  | end    |                   | locus PP_                        |
| 14181                                          | 15830  | 14354  | 15830  | 2.77              | 0013>                            |
| 61840                                          | 62547  | 61839  | 62515  | 2.74              | 0053>                            |
| 73718                                          | 74458  | 73729  | 74900  | 3.65              | <b>0063</b> ><0064               |
| 94454                                          | 94930  | 94462  | 94939  | 3.09              | 0084>< <b>0085</b>               |
| 95034                                          | 95923  | 95028  | 95913  | 2.65              | <0085 <b>86</b> > <b>87</b> ><88 |
| 147520                                         | 148125 | 147475 | 148138 | 3.12              | < <b>0139</b> <0140              |
| 168416                                         | 170838 | 168416 | 170834 | 2.32              | 0158>0159>                       |
| 171386                                         | 172939 | 171359 | 172941 | 6.21              | 16SA (rRNA)>                     |
| 173232                                         | 176106 | 173071 | 176108 | 4.64              | 23SA (rRNA)>                     |
| 176821                                         | 178369 | 176800 | 178370 | 7.40              | 5SA (rRNA)>                      |
| 178673                                         | 181522 | 178511 | 181537 | 4.70              | 23SB (rRNA)>                     |
| 225090                                         | 225629 | 225117 | 225618 | 4.41              | <0173                            |
| 253817                                         | 254334 | 253874 | 254318 | 3.15              | <0203                            |
| 313343                                         | 313943 | 313343 | 313945 | 2.26              | <b>0258</b> ><0259               |
| 314667                                         | 315358 | 314708 | 315367 | 3.03              | <b>0260</b> >0261>               |
| 333211                                         | 333697 | 333212 | 333676 | 3.64              | 5435> <b>0274</b> >              |
| 339227                                         | 340248 | 339227 | 340259 | 2.20              | <0281< <b>0282 (art)</b> <0283   |
| 351734                                         | 352280 | 351724 | 352265 | 3.75              | <b>0292</b> >0293>               |
| 355137                                         | 356457 | 355067 | 356454 | 2.34              | <0295< <b>0296</b>               |
| 358290                                         | 360006 | 358257 | 360006 | 2.34              | 5441> <b>0298</b> ><0299         |

|   |         |         |         |         |      |                                  |
|---|---------|---------|---------|---------|------|----------------------------------|
|   | 371831  | 372650  | 378067  | 378783  | 2.51 | 0310>                            |
|   | 390819  | 391513  | 390819  | 391644  | 2.45 | 0325>                            |
|   | 394576  | 395854  | 394588  | 395840  | 2.34 | 0328>                            |
|   | 406290  | 408007  | 406290  | 408005  | 2.18 | <0338                            |
|   | 432981  | 435388  | 432962  | 435392  | 2.37 | <0356                            |
| a | 448788  | 450486  | 448793  | 450452  | 3.61 | 0370>                            |
|   | 450517  | 451034  | 450513  | 451049  | 8.36 | <b>mr05 (rsmY)</b> ><0371        |
|   | 524940  | 526464  | 524928  | 526469  | 6.07 | 16SC (rRNA)>                     |
|   | 526802  | 529660  | 526632  | 529683  | 4.43 | 23SC (rRNA)>                     |
|   | 593360  | 594184  | 593358  | 594171  | 2.67 | 0503>< <b>0504</b>               |
|   | 627312  | 629948  | 627322  | 630285  | 2.27 | < <b>0541&lt;0542&lt;0543</b>    |
|   | 634152  | 635642  | 634126  | 635497  | 2.53 | 0546>                            |
|   | 641025  | 642518  | 641053  | 642923  | 2.56 | <0552<0553                       |
|   | 655922  | 656371  | 655893  | 656381  | 4.42 | < <b>0563 (gcbA)</b>             |
|   | 672573  | 673831  | 672652  | 673856  | 2.32 | <b>0573&gt;&lt;0574 &lt;0575</b> |
|   | 697826  | 699335  | 697803  | 699337  | 5.40 | 16SD (rRNA)>                     |
|   | 699875  | 702746  | 699861  | 702788  | 4.36 | 23SD (rRNA)>                     |
|   | 731735  | 733043  | 731795  | 733080  | 2.25 | 0625>                            |
|   | 734169  | 735287  | 734162  | 735289  | 2.84 | <0626                            |
|   | 751774  | 752773  | 751762  | 752797  | 2.48 | 5451><0641                       |
|   | 792929  | 793689  | 792919  | 793688  | 2.16 | <0678< <b>0679</b>               |
|   | 826796  | 827530  | 826783  | 827496  | 5.13 | 0711>                            |
|   | 958559  | 959213  | 958536  | 959222  | 2.67 | <b>0820&gt;0821&gt;</b>          |
|   | 1026884 | 1027651 | 1026650 | 1027643 | 2.37 | <0884<0885                       |
|   | 1027877 | 1028824 | 1027878 | 1028799 | 2.24 | <0885                            |
|   | 1048261 | 1048900 | 1048287 | 1048910 | 4.04 | <0906< <b>0907</b>               |
|   | 1084145 | 1084974 | 1084147 | 1084952 | 2.53 | <b>0938&gt;0939&gt;</b>          |
|   | 1103391 | 1104847 | 1103389 | 1104959 | 2.37 | 0964> 0965>                      |
|   | 1118683 | 1120218 | 1118677 | 1120244 | 2.17 | 0979> <b>0980&gt;</b>            |
|   | 1149910 | 1151059 | 1149882 | 1151081 | 2.32 | <1009                            |
|   | 1158027 | 1158461 | 1158051 | 1158625 | 3.00 | 1015>                            |
|   | 1177549 | 1178761 | 1177513 | 1178772 | 3.52 | 1032>                            |
|   | 1223172 | 1224770 | 1223163 | 1224127 | 2.61 | <1067< <b>1068&lt;1069</b>       |
|   | 1231802 | 1232687 | 1231405 | 1232644 | 2.29 | <1073                            |
|   | 1242584 | 1242946 | 1242607 | 1242936 | 3.18 | <1083                            |
|   | 1246975 | 1248211 | 1246994 | 1248212 | 2.29 | 1088>                            |
|   | 1284031 | 1285573 | 1284037 | 1285630 | 2.15 | 1121>1122>                       |
|   | 1316197 | 1316515 | 1316188 | 1316503 | 3.83 | >mr_15                           |
|   | 1325493 | 1327014 | 1325484 | 1327035 | 5.98 | 16SE (rRNA)                      |
|   | 1327335 | 1330214 | 1327345 | 1330221 | 4.60 | 23SE (rRNA)                      |
|   | 1365307 | 1365890 | 1365301 | 1365866 | 2.95 | <1189< <b>1190&lt;1191</b>       |
|   | 1388744 | 1389437 | 1388757 | 1389459 | 2.25 | 1210> 1211>                      |
|   | 1556616 | 1557427 | 1556722 | 1557248 | 4.16 | <b>1367&gt;5468&gt;&lt;1368</b>  |
|   | 1566286 | 1567285 | 1566295 | 1567284 | 3.74 | 1375>                            |
|   | 1606506 | 1607728 | 1606526 | 1607758 | 2.44 | <t64< <b>1408</b>                |
|   | 1635349 | 1635782 | 1635348 | 1635764 | 3.64 | 1434>                            |
|   | 1642738 | 1643190 | 1642744 | 1643207 | 3.00 | <1443                            |
|   | 1695927 | 1696463 | 1695966 | 1696447 | 4.18 | 1491> <b>1492&gt;</b>            |
|   | 1704467 | 1706089 | 1704431 | 1706144 | 2.50 | 1498> <b>1499&gt;1500&gt;</b>    |
|   | 1707234 | 1708652 | 1707235 | 1708677 | 2.62 | <1502<1503                       |
|   | 1712253 | 1712984 | 1712278 | 1712974 | 2.52 | 1506>                            |
|   | 1818338 | 1819856 | 1818329 | 1819847 | 2.20 | 1622> <b>1623 (rps5)</b>         |
|   | 1821916 | 1822568 | 1821915 | 1822572 | 4.58 | <b>mr22 (rsmZ)</b> ><1625        |
|   | 1835561 | 1836387 | 1835569 | 1836388 | 2.56 | <1640                            |
|   | 1850565 | 1851738 | 1850560 | 1853204 | 2.30 | 1655> <b>1656 (relA)</b>         |
|   | 1854898 | 1859288 | 1854881 | 1859321 | 2.31 | 1659>1660>1661>                  |
|   | 1929953 | 1930336 | 1929937 | 1930305 | 3.59 | <1728< <b>1729</b>               |
|   | 1932610 | 1933737 | 1932610 | 1933722 | 2.48 | <1732<1733                       |
|   | 1941417 | 1942423 | 1941431 | 1942411 | 2.48 | 1741>                            |
|   | 1942490 | 1944699 | 1942485 | 1944588 | 2.16 | 1742>1743>                       |
|   | 1957538 | 1959041 | 1957518 | 1959064 | 2.35 | 1754><1755                       |
|   | 1966194 | 1968002 | 1966189 | 1968117 | 2.42 | <b>1762&gt;&lt;1763</b>          |
|   | 2039861 | 2040498 | 2039851 | 2040504 | 3.22 | 1813><1814                       |
|   | 2063621 | 2064532 | 2063624 | 2064379 | 2.26 | <b>1840&gt;&lt;1841</b>          |
| b | 2085085 | 2086270 | 2085069 | 2086173 | 4.89 | 1865>                            |
|   | 2087614 | 2088164 | 2087586 | 2088178 | 4.84 | intergenic 1865/66               |
|   | 2126927 | 2127555 | 2126932 | 2127745 | 3.70 | 1887>                            |
|   | 2239977 | 2241299 | 2239978 | 2240657 | 2.55 | 1977>                            |
|   | 2250636 | 2253157 | 2250633 | 2253175 | 2.27 | <b>1985&gt;1986&gt;1987&gt;</b>  |
|   | 2253577 | 2256019 | 2253653 | 2256015 | 2.19 | 1987> <b>1988&gt;1989</b>        |
|   | 2370904 | 2372080 | 2370860 | 2372134 | 2.68 | 2080>                            |

|         |         |         |         |      |                                                                  |
|---------|---------|---------|---------|------|------------------------------------------------------------------|
| 2388216 | 2388755 | 2388247 | 2388753 | 2.29 | <5502<mr31                                                       |
| 2412233 | 2413404 | 2412355 | 2413528 | 4.19 | 2113>(419bp)2114>                                                |
| 2439257 | 2440414 | 2439264 | 2440284 | 2.65 | 2137>                                                            |
| 2492000 | 2494667 | 2493440 | 2494708 | 2.17 | 2185> <b>2186</b> < <b>2187</b>                                  |
| 2501704 | 2502448 | 2501869 | 2502460 | 3.94 | 2195>                                                            |
| 2507033 | 2508097 | 2507624 | 2508096 | 3.52 | 2200>< <b>2201</b>                                               |
| 2526550 | 2529551 | 2526877 | 2529510 | 3.05 | 2215> <b>16</b> > <b>17</b> >(405bp)18>                          |
| 2530422 | 2530940 | 2530425 | 2530952 | 4.88 | 2218> <b>2219</b> >                                              |
| 2548691 | 2550200 | 2548661 | 2550209 | 5.59 | 16SF (rRNA)                                                      |
| 2550746 | 2553605 | 2550754 | 2553649 | 4.46 | 23SF (rRNA)                                                      |
| 2624383 | 2624965 | 2624379 | 2624961 | 2.99 | <b>2296</b> >2297>                                               |
| 2630537 | 2633506 | 2631293 | 2633498 | 2.27 | 2302> <b>2303</b> > 2304>                                        |
| 2640062 | 2640698 | 2639754 | 2640704 | 3.56 | <2310                                                            |
| 2668138 | 2672391 | 2668152 | 2672546 | 2.46 | 2338>< <b>2339</b>                                               |
| 2676298 | 2677399 | 2676326 | 2677333 | 2.46 | <b>2345</b> > <b>2346</b> >2347>                                 |
| 2742167 | 2743107 | 2742155 | 2743094 | 3.64 | <b>2396</b> >2397>                                               |
| 2783732 | 2784188 | 2783699 | 2784134 | 3.32 | 2437>                                                            |
| 2786580 | 2786930 | 2786570 | 2786954 | 3.46 | <2438                                                            |
| 2787003 | 2787631 | 2787011 | 2787626 | 3.03 | 2439>                                                            |
| 2799214 | 2800222 | 2799184 | 2800274 | 2.45 | <2453                                                            |
| 2816104 | 2817163 | 2816115 | 2817121 | 2.18 | 2470> <b>71</b> > <b>72</b> > <b>t44</b>                         |
| 2819979 | 2820327 | 2819970 | 2820324 | 3.70 | 2473>                                                            |
| 2850955 | 2851307 | 2850943 | 2851315 | 4.63 | <b>2504</b> >5530>                                               |
| 2935929 | 2937830 | 2935909 | 2937783 | 2.18 | 2569>                                                            |
| 3024219 | 3024876 | 3024184 | 3025008 | 3.68 | < <b>2640</b> <2641                                              |
| 3035273 | 3036416 | 3035278 | 3036411 | 3.47 | <2648                                                            |
| 3054043 | 3054519 | 3053259 | 3054527 | 3.87 | <2666                                                            |
| 3070099 | 3070487 | 3070086 | 3070431 | 4.18 | 2680>                                                            |
| 3070606 | 3071644 | 3070593 | 3071642 | 3.36 | <b>2681</b> >2682>                                               |
| 3114613 | 3115207 | 3114729 | 3115093 | 4.49 | 2730>2731>                                                       |
| 3247256 | 3247711 | 3247262 | 3247692 | 3.42 | 2842>                                                            |
| 3258671 | 3260415 | 3258656 | 3260425 | 2.35 | <2856<2857                                                       |
| 3273526 | 3273991 | 3273532 | 3274043 | 3.05 | 2871>                                                            |
| 3301631 | 3302368 | 3301651 | 3302366 | 2.52 | <b>2904</b> >                                                    |
| 3311205 | 3312297 | 3310791 | 3312308 | 2.49 | 2911> 2912>                                                      |
| 3325245 | 3327294 | 3325259 | 3327282 | 2.62 | 2925><2926                                                       |
| 3349120 | 3350921 | 3349096 | 3350928 | 2.19 | 2944> <b>2945</b> >                                              |
| 3400458 | 3401230 | 3400542 | 3401258 | 5.02 | <3006< <b>3007</b>                                               |
| 3402085 | 3402549 | 3402122 | 3402559 | 4.60 | 3010>                                                            |
| 3464260 | 3465435 | 3464255 | 3465436 | 2.42 | <3078< <b>3079</b> <3080                                         |
| 3477948 | 3478706 | 3477928 | 3478709 | 2.32 | <3088< <b>3089</b>                                               |
| 3494411 | 3495339 | 3494402 | 3495329 | 4.34 | <3098<3099                                                       |
| 3513711 | 3514123 | 3513671 | 3514139 | 4.47 | 3108>                                                            |
| 3540612 | 3542076 | 3540793 | 3542115 | 2.45 | 3127> <b>3128</b> ><3129 ( <i>pea</i> )                          |
| 3543579 | 3544552 | 3543671 | 3544604 | 2.78 | <3130                                                            |
| 3549398 | 3552017 | 3549253 | 3552040 | 2.17 | <b>3133</b> > <b>34</b> > <b>35</b> > <b>36</b> > ( <i>pea</i> ) |
| 3554125 | 3555107 | 3554036 | 3554899 | 2.40 | 3138>3139>                                                       |
| 3575447 | 3576499 | 3575446 | 3576480 | 2.15 | <3156                                                            |
| 3671710 | 3672101 | 3671708 | 3672080 | 3.65 | 3234> <b>3235</b> >                                              |
| 3703482 | 3703885 | 3703460 | 3703885 | 4.14 | <5597 (250 pb)                                                   |
| 3748674 | 3750421 | 3748718 | 3750420 | 3.11 | <3311< <b>3312</b> < <b>3313</b> < <b>3314</b>                   |
| 3761211 | 3761602 | 3761203 | 3761598 | 3.71 | 3325>                                                            |
| 3841818 | 3844425 | 3841847 | 3844429 | 2.25 | <3391< <b>3392</b> <3393                                         |
| 3889343 | 3890909 | 3889347 | 3890885 | 2.39 | 3432>< <b>3433</b> < <b>3434</b>                                 |
| 3924796 | 3925304 | 3924810 | 3925292 | 3.37 | <3461< <b>5602</b>                                               |
| 4013159 | 4013712 | 4013161 | 4013721 | 2.87 | mr44>                                                            |
| 4022139 | 4023114 | 4022125 | 4023093 | 6.04 | <3547(666bp) <3548                                               |
| 4061881 | 4062838 | 4061882 | 4062802 | 2.41 | <b>3580</b> ><3581                                               |
| 4086523 | 4087494 | 4086513 | 4087487 | 2.22 | <b>3596</b> ( <i>amaD</i> )> <b>3597</b> >                       |
| 4114287 | 4114797 | 4114285 | 4114747 | 4.09 | <3620                                                            |
| 4144163 | 4145054 | 4144145 | 4145096 | 2.72 | 3648> <b>3649</b> >                                              |
| 4160099 | 4160858 | 4160146 | 4160882 | 2.59 | <b>3662</b> ><3663                                               |
| 4184187 | 4184875 | 4184152 | 4184801 | 3.80 | <b>3680</b> > <b>3681</b> >                                      |
| 4197055 | 4197785 | 4197048 | 4197814 | 4.04 | <5620                                                            |
| 4209784 | 4210288 | 4209898 | 4210335 | 3.20 | 3692>                                                            |
| 4244409 | 4245111 | 4244630 | 4245148 | 2.99 | <3721<3722                                                       |
| 4272704 | 4273098 | 4272712 | 4273117 | 3.85 | <b>3743</b> ><3744                                               |
| 4289421 | 4290858 | 4289279 | 4290161 | 3.04 | < <b>3761</b> ( <i>cfcA</i> )                                    |
| 4295633 | 4296371 | 4295634 | 4296298 | 2.56 | 3765>                                                            |
| 4302943 | 4304486 | 4303221 | 4304468 | 2.97 | < <b>3775</b> <3776                                              |
| 4306075 | 4306926 | 4306072 | 4306929 | 3.00 | <3778                                                            |

|   |         |         |         |         |      |                                     |
|---|---------|---------|---------|---------|------|-------------------------------------|
|   | 4321162 | 4321821 | 4321170 | 4321826 | 3.09 | 5629>                               |
|   | 4325479 | 4326936 | 4325485 | 4326948 | 2.15 | 3796>                               |
|   | 4329856 | 4330807 | 4329980 | 4330799 | 2.27 | 3801>3802>                          |
|   | 4357839 | 4358524 | 4357838 | 4358524 | 2.53 | <b>3832(rsmE)</b> ><3833            |
|   | 4415756 | 4416152 | 4415762 | 4416153 | 4.06 | 3901>                               |
|   | 4418225 | 4419212 | 4418122 | 4419200 | 3.18 | 3908><3909                          |
|   | 4458536 | 4458988 | 4458505 | 4459004 | 3.32 | 3952>(266bp)3953>                   |
| a | 4472735 | 4473269 | 4472724 | 4473293 | 4.08 | 3962>(665bp)                        |
|   | 4473355 | 4474160 | 4473367 | 4474239 | 4.77 | <b>3963</b> ><3964                  |
|   | 4520030 | 4521771 | 4520018 | 4521771 | 2.21 | 4010><4011                          |
|   | 4533735 | 4534643 | 4533742 | 4534641 | 2.47 | 4021>                               |
|   | 4583557 | 4584376 | 4583534 | 4584141 | 2.34 | <4060                               |
|   | 4634949 | 4636282 | 4635010 | 4636299 | 2.56 | <4098< <b>99</b> <100               |
|   | 4643129 | 4644681 | 4643116 | 4644693 | 2.47 | <b>4108</b> ><4109                  |
|   | 4645433 | 4647635 | 4645696 | 4647631 | 2.51 | 4111>                               |
|   | 4679897 | 4680813 | 4680062 | 4680799 | 2.71 | <4143                               |
|   | 4698169 | 4698690 | 4698164 | 4698682 | 4.18 | <4158                               |
|   | 4712301 | 4712839 | 4712285 | 4712848 | 2.91 | <b>4171</b> >                       |
|   | 4739415 | 4740721 | 4739432 | 4740824 | 2.28 | 4194>                               |
|   | 4765303 | 4767845 | 4765312 | 4767833 | 2.69 | 4217>                               |
|   | 4839441 | 4842928 | 4839431 | 4842902 | 2.52 | 4254>55>56>57>58                    |
|   | 4850156 | 4851247 | 4850154 | 4851293 | 2.19 | <b>4265</b> > 4266>                 |
|   | 4855177 | 4855801 | 4855185 | 4855801 | 2.56 | <b>4270</b> >                       |
|   | 4858749 | 4859210 | 4858705 | 4859220 | 3.00 | <mr49                               |
|   | 4866695 | 4867460 | 4866720 | 4867443 | 3.02 | <b>4278</b> >                       |
| b | 4907783 | 4908137 | 4908163 | 4908682 | 4.46 | <4317( <b>277bp</b> ) <b>4318</b> > |
|   | 4909436 | 4910660 | 4909457 | 4910667 | 4.21 | <b>4318</b> >(477bp)<19<20          |
|   | 5015913 | 5017379 | 5015913 | 5017387 | 2.71 | <4421                               |
|   | 5097178 | 5099284 | 5097222 | 5099274 | 2.25 | <4487                               |
|   | 5101878 | 5103150 | 5101881 | 5103118 | 2.35 | 4490>4491>                          |
|   | 5157544 | 5158127 | 5157551 | 5158127 | 4.27 | <b>4541</b> >4542>                  |
|   | 5158518 | 5158900 | 5158534 | 5158931 | 3.91 | 4542>                               |
|   | 5180332 | 5181109 | 5180378 | 5181100 | 3.75 | 4558>< <b>4559</b> <4560            |
|   | 5189154 | 5189742 | 5188989 | 5189780 | 2.54 | <4569< <b>4570</b> <4571            |
|   | 5190285 | 5191413 | 5190284 | 5191443 | 2.51 | <4571                               |
|   | 5237101 | 5237601 | 5237094 | 5237604 | 2.57 | 5700>                               |
|   | 5264221 | 5267124 | 5264217 | 5267154 | 2.36 | <4640<4641                          |
|   | 5291833 | 5294427 | 5291753 | 5294407 | 2.17 | <4666<4667                          |
|   | 5307693 | 5310555 | 5307688 | 5310568 | 5.02 | 235G (rRNA)                         |
|   | 5311157 | 5312725 | 5311125 | 5312725 | 6.36 | 165G (rRNA)                         |
|   | 5316056 | 5317136 | 5316069 | 5317160 | 2.48 | <4678                               |
|   | 5325028 | 5325565 | 5325055 | 5325537 | 2.36 | 4685>mr52>                          |
|   | 5338209 | 5338748 | 5338204 | 5338748 | 3.93 | mr53>                               |
|   | 5344571 | 5346807 | 5344587 | 5346814 | 2.22 | 4702>                               |
|   | 5351298 | 5351797 | 5351288 | 5351823 | 3.20 | <4707                               |
|   | 5351979 | 5353807 | 5351953 | 5353858 | 2.15 | <4708                               |
|   | 5389637 | 5390452 | 5389635 | 5390495 | 2.49 | 4738> tm01>                         |
|   | 5425060 | 5425437 | 5425082 | 5425440 | 3.85 | 4764>(147pb)                        |
|   | 5437583 | 5437900 | 5437606 | 5437900 | 8.19 | <mr57                               |
|   | 5455583 | 5455992 | 5455589 | 5455993 | 3.13 | <4792<4793                          |
|   | 5458826 | 5459596 | 5458716 | 5459551 | 3.79 | <b>4794</b> > <b>4795</b> >4796>    |
|   | 5483693 | 5484213 | 5483695 | 5484190 | 3.29 | <b>4822</b> >                       |
|   | 5533169 | 5534481 | 5533192 | 5534480 | 2.44 | <4866<4867                          |
|   | 5542726 | 5545081 | 5542713 | 5545108 | 2.15 | <4874<75<76<77                      |
|   | 5554163 | 5555573 | 5554156 | 5555561 | 3.06 | <4885< <b>4886</b> < <b>4887</b>    |
|   | 5557919 | 5559481 | 5557921 | 5559500 | 2.19 | <4889<4890                          |
|   | 5592478 | 5592875 | 5592472 | 5592909 | 3.47 | 4920><4921                          |
|   | 5633408 | 5634449 | 5633348 | 5634471 | 2.67 | 4947>                               |
|   | 5655623 | 5657257 | 5655630 | 5657211 | 2.73 | <4965                               |
|   | 5667891 | 5669578 | 5667863 | 5669590 | 2.42 | <b>mr59</b> > <b>4976</b> >4977>    |
|   | 5674697 | 5675503 | 5674697 | 5675814 | 2.17 | 4980>< <b>4981</b> <4982            |
|   | 5695783 | 5696600 | 5695784 | 5696591 | 2.75 | <b>4999</b> >                       |
|   | 5699356 | 5700384 | 5699356 | 5700535 | 2.44 | <b>5003</b> >                       |
|   | 5704485 | 5705484 | 5704480 | 5705477 | 2.46 | < <b>5007</b> <5008                 |
|   | 5752026 | 5753474 | 5752008 | 5753472 | 2.16 | 5046>                               |
|   | 5801087 | 5801596 | 5801067 | 5801584 | 2.77 | < <b>5079</b>                       |
|   | 5804855 | 5805371 | 5804834 | 5805349 | 3.54 | < <b>5083</b> 5084>                 |
|   | 5821902 | 5823133 | 5821909 | 5823129 | 2.91 | 5098> <b>5099</b> >5100>            |
|   | 5852162 | 5852598 | 5852172 | 5852593 | 4.09 | <5129<5720                          |
|   | 5892769 | 5893243 | 5892789 | 5893262 | 3.16 | <5167                               |
|   | 5896282 | 5896649 | 5896275 | 5896571 | 3.90 | <5171                               |

|         |         |         |         |      |                 |
|---------|---------|---------|---------|------|-----------------|
| 5912714 | 5914201 | 5912653 | 5914182 | 2.55 | 5184>           |
| 5919005 | 5919586 | 5919017 | 5919555 | 2.37 | 5189>5190>      |
| 5930846 | 5931762 | 5930842 | 5931780 | 2.67 | <5198<5199      |
| 5936428 | 5937988 | 5936420 | 5938023 | 3.39 | 5206>5207>      |
| 5941844 | 5942543 | 5941988 | 5942556 | 3.73 | <5209           |
| 5965490 | 5966129 | 5965507 | 5966108 | 2.29 | 5231><5232      |
| 6027907 | 6029544 | 6027908 | 6029541 | 2.39 | <5278           |
| 6060952 | 6061450 | 6060951 | 6061470 | 2.45 | <5313           |
| 6114030 | 6115621 | 6114043 | 6115616 | 2.20 | 5364><5365      |
| 6130950 | 6131902 | 6131168 | 6131913 | 3.26 | <5379<5732<5380 |
| 6145339 | 6147414 | 6145376 | 6147403 | 2.36 | <5389<90<91<92  |
| 6150919 | 6153185 | 6150923 | 6153156 | 2.21 | 5395>5737>5738  |

| RsmE; -10logPval > 170; fold enrichment ≥ 4 |         |         |         |         |         |              |                                 |
|---------------------------------------------|---------|---------|---------|---------|---------|--------------|---------------------------------|
| RsmE1                                       |         | RsmE2   |         | RsmE3   |         | average Fold | 270 [261] targets               |
| start                                       | end     | start   | end     | start   | end     | enr.         | locus PP_                       |
| 48149                                       | 48591   | 48149   | 48605   | 48207   | 48615   | 9.49         | <0043                           |
| 61346                                       | 62727   | 61356   | 62750   | 61338   | 62726   | 6.99         | 0053>                           |
| 73573                                       | 74445   | 73544   | 74458   | 73676   | 74440   | 6.90         | 0063><64                        |
| 74489                                       | 74890   | 74489   | 74900   | 74459   | 74888   | 7.18         | <0064<0065                      |
| 94555                                       | 94940   | 94507   | 94961   | 94511   | 94940   | 8.58         | 0084><0085                      |
| 105204                                      | 106008  | 105182  | 106008  | 105204  | 106002  | 4.32         | 0100>                           |
| 107617                                      | 108469  | 107624  | 108479  | 107615  | 108453  | 4.75         | 0101><5426                      |
| 108701                                      | 110556  | 108701  | 110643  | 108731  | 111154  | 5.45         | 0103>0104>                      |
| 155538                                      | 155919  | 155549  | 155974  | 155543  | 155780  | 8.65         | <0146                           |
| 161031                                      | 162057  | 161043  | 162029  | 161032  | 162066  | 4.72         | <0152 <0153                     |
| 169635                                      | 170001  | 169598  | 170110  | 169626  | 169947  | 7.23         | 0159>                           |
| 219026                                      | 220648  | 219039  | 220615  | 219193  | 220663  | 4.59         | 0168 ( <i>lapA</i> )> 5431>     |
| 224752                                      | 225652  | 224764  | 225633  | 224752  | 225680  | 4.70         | <0173                           |
| 233559                                      | 234386  | 233595  | 234393  | 233547  | 234374  | 5.40         | 0180><0181<0182                 |
| 236999                                      | 238376  | 236996  | 238288  | 237057  | 238405  | 5.01         | 0185>                           |
| 300468                                      | 300862  | 300498  | 300836  | 300497  | 300865  | 6.18         | <0245                           |
| 344515                                      | 344969  | 344455  | 344936  | 344643  | 344945  | 8.75         | <0285<0286<0287                 |
| 351586                                      | 352596  | 351614  | 352597  | 351599  | 352495  | 7.81         | 0292>0293>                      |
| 439710                                      | 440037  | 439696  | 440037  | 439716  | 440026  | 7.99         | <0361                           |
| 448800                                      | 451299  | 448799  | 451290  | 448829  | 451258  | 16.46        | 0370>mr05 ( <i>rsmY</i> )><0371 |
| 456576                                      | 457049  | 456578  | 457039  | 456570  | 457007  | 7.71         | <0375<0376                      |
| 470467                                      | 470964  | 470465  | 470989  | 470465  | 470969  | 6.03         | <0386                           |
| 506318                                      | 507068  | 506317  | 507069  | 506392  | 507069  | 4.86         | 0417>                           |
| 514196                                      | 516151  | 514267  | 516103  | 514265  | 516118  | 5.47         | <0426<0427<0428                 |
| 583890                                      | 584224  | 583916  | 584232  | 583924  | 584253  | 5.75         | 0493>0494>PP_t75                |
| 606171                                      | 606790  | 606129  | 606693  | 606220  | 606665  | 5.46         | 0521>                           |
| 627337                                      | 628104  | 627338  | 628131  | 627339  | 628117  | 5.08         | <0541 <0542                     |
| 634324                                      | 635488  | 634336  | 635499  | 634598  | 635475  | 5.79         | 0546>                           |
| 639535                                      | 640533  | 639565  | 640532  | 639590  | 640477  | 7.69         | <0551                           |
| 655517                                      | 656394  | 655515  | 656397  | 655650  | 656375  | 5.58         | <0563 ( <i>gcbA</i> )           |
| 666110                                      | 666526  | 666112  | 666557  | 666198  | 666495  | 8.38         | 0570>                           |
| 672699                                      | 673923  | 672730  | 673929  | 672720  | 673900  | 4.86         | <0574 <0575                     |
| 713481                                      | 714728  | 713483  | 714751  | 713475  | 714693  | 5.69         | 0604>0605>0606>                 |
| 733825                                      | 735319  | 733840  | 735348  | 733787  | 735340  | 6.10         | <0626                           |
| 762618                                      | 763265  | 762625  | 763234  | 762668  | 763277  | 7.64         | 0654> 0655>                     |
| 826797                                      | 827801  | 826757  | 827762  | 826806  | 827750  | 5.33         | 0711>0712>                      |
| 914446                                      | 914993  | 914565  | 914991  | 914564  | 914964  | 8.21         | 0795>                           |
| 921446                                      | 921928  | 921455  | 921912  | 921471  | 921943  | 6.61         | <0802                           |
| 958562                                      | 959221  | 958568  | 959203  | 958561  | 959204  | 5.24         | 0820> 0821>                     |
| 970998                                      | 971731  | 971013  | 971741  | 970995  | 971722  | 4.78         | 0833>0834>0835>                 |
| 974623                                      | 975264  | 974648  | 975269  | 974629  | 975203  | 5.34         | 0837>                           |
| 1044972                                     | 1045340 | 1044968 | 1045336 | 1044992 | 1045338 | 5.88         | 0904>0905><0906                 |
| 1048152                                     | 1048793 | 1048342 | 1048810 | 1048303 | 1048730 | 6.94         | <0906<0907                      |
| 1057527                                     | 1058106 | 1057537 | 1058137 | 1057519 | 1058105 | 5.07         | <0914 ( <i>bifA</i> )           |
| 1074736                                     | 1075187 | 1074779 | 1075224 | 1074736 | 1075216 | 5.61         | <0930<931<932                   |
| 1084055                                     | 1084992 | 1084040 | 1084995 | 1084066 | 1084966 | 6.93         | 0938>0939>                      |
| 1094728                                     | 1095477 | 1094744 | 1095453 | 1094694 | 1095479 | 4.83         | <0952                           |
| 1114905                                     | 1115445 | 1114900 | 1115441 | 1114913 | 1115395 | 5.56         | intergenic <977                 |
| 1124594                                     | 1125125 | 1124608 | 1125128 | 1124665 | 1125077 | 4.88         | <0986                           |
| 1136929                                     | 1142624 | 1136939 | 1142604 | 1136929 | 1142628 | 4.24         | <0997 to <1002 ( <i>arcD</i> )  |

|   |         |         |         |         |         |         |       |                                                 |
|---|---------|---------|---------|---------|---------|---------|-------|-------------------------------------------------|
|   | 1157829 | 1159238 | 1157858 | 1159222 | 1157860 | 1159110 | 5.14  | 1015>                                           |
|   | 1177879 | 1178776 | 1177839 | 1178752 | 1177881 | 1178749 | 5.40  | 1032>                                           |
| c | 1206705 | 1207093 | 1206781 | 1207138 | 1206818 | 1207091 | 6.51  |                                                 |
|   | 1208466 | 1209019 | 1208402 | 1209026 | 1208475 | 1209045 | 6.69  | <1058                                           |
|   | 1231773 | 1232720 | 1231732 | 1232714 | 1231665 | 1232714 | 7.87  | <1073                                           |
|   | 1242583 | 1242868 | 1242643 | 1242938 | 1242580 | 1242915 | 7.38  | <1083                                           |
|   | 1271714 | 1273841 | 1272242 | 1273205 | 1271703 | 1273614 | 4.77  | 1112> <b>1113</b> ><1114<1115                   |
|   | 1316253 | 1317046 | 1316225 | 1317038 | 1316256 | 1317047 | 5.37  | mr15> 1150>                                     |
|   | 1365326 | 1365958 | 1365354 | 1366063 | 1365379 | 1365866 | 4.95  | < <b>1189</b> < <b>1190</b> <1191               |
|   | 1375697 | 1376718 | 1375624 | 1376326 | 1375879 | 1376651 | 7.93  | 1200><1201                                      |
|   | 1388757 | 1389802 | 1388737 | 1389781 | 1388757 | 1389771 | 4.46  | 1210> 1211>                                     |
|   | 1431327 | 1431818 | 1431361 | 1431833 | 1431349 | 1431833 | 6.72  | 1252>< <b>1253</b>                              |
|   | 1556633 | 1557505 | 1556715 | 1557248 | 1556715 | 1557272 | 6.81  | 1367> <b>5468</b> ><1368                        |
|   | 1565412 | 1565992 | 1565389 | 1565984 | 1565379 | 1565967 | 6.68  | intergenic <1374                                |
|   | 1635110 | 1635746 | 1635328 | 1635794 | 1635103 | 1635747 | 7.33  | 1434>                                           |
| c | 1642293 | 1643454 | 1642296 | 1643446 | 1642529 | 1643432 | 8.16  |                                                 |
|   | 1643524 | 1644222 | 1643591 | 1644158 | 1643562 | 1644127 | 7.66  | <1443                                           |
|   | 1647384 | 1647864 | 1647396 | 1647864 | 1647386 | 1647805 | 7.96  | <1445                                           |
|   | 1689622 | 1690917 | 1689394 | 1690899 | 1689425 | 1690893 | 4.90  | <1486                                           |
|   | 1696064 | 1696451 | 1696112 | 1696463 | 1696101 | 1696439 | 7.04  | 1492>                                           |
|   | 1697782 | 1698669 | 1697823 | 1698680 | 1697834 | 1698691 | 7.45  | 1492>1493>                                      |
|   | 1704013 | 1706085 | 1704018 | 1706086 | 1704020 | 1705656 | 7.10  | 1497> <b>1498</b> > <b>1499</b> >1500>          |
|   | 1708765 | 1709219 | 1708762 | 1709207 | 1708778 | 1709174 | 5.82  | <1504                                           |
|   | 1719241 | 1720003 | 1719246 | 1720011 | 1719244 | 1720002 | 7.56  | <1515                                           |
|   | 1802749 | 1803303 | 1802767 | 1803299 | 1802765 | 1803309 | 4.90  | 1606>                                           |
|   | 1821872 | 1822671 | 1821901 | 1822713 | 1821906 | 1822661 | 11.58 | mr22 ( <i>rsmZ</i> )>< <b>1625</b>              |
|   | 1853775 | 1855283 | 1853781 | 1855289 | 1854082 | 1855283 | 4.83  | 1657> <b>1658</b> >(309bp) 1659>                |
|   | 1879235 | 1880240 | 1879235 | 1880135 | 1879237 | 1880133 | 7.21  | 1686><1687                                      |
|   | 1918256 | 1920379 | 1918258 | 1920379 | 1918258 | 1919398 | 4.49  | <1719                                           |
|   | 1925714 | 1926983 | 1925667 | 1926958 | 1925714 | 1926963 | 5.11  | <1726                                           |
|   | 1929947 | 1930338 | 1929939 | 1930340 | 1929944 | 1930345 | 7.12  | <1728< <b>1729</b>                              |
|   | 1941388 | 1942473 | 1941398 | 1944606 | 1941381 | 1942473 | 4.59  | 1741>                                           |
|   | 2002851 | 2003805 | 2002852 | 2003800 | 2002822 | 2003760 | 6.05  | 1786>1787>                                      |
|   | 2039016 | 2039511 | 2039039 | 2039509 | 2039086 | 2039493 | 9.29  | <PP1811                                         |
|   | 2039853 | 2040903 | 2039822 | 2040752 | 2039842 | 2040780 | 7.75  | <b>1813</b> >< <b>1814</b> 1815>                |
|   | 2064720 | 2065326 | 2064723 | 2065322 | 2064717 | 2065313 | 7.54  | <1841                                           |
| b | 2085285 | 2085639 | 2085331 | 2086328 | 2085333 | 2086323 | 9.70  | 1865>                                           |
|   | 2086914 | 2087443 | 2086904 | 2087515 | 2086903 | 2087531 | 8.64  | 1865> intergenic                                |
|   | 2087627 | 2088157 | 2087606 | 2088166 | 2087634 | 2088157 | 12.79 | intergenic 1865/66                              |
|   | 2096575 | 2097187 | 2096616 | 2097283 | 2096615 | 2097145 | 5.31  | <b>1873</b> >1874>                              |
|   | 2126867 | 2127593 | 2126869 | 2127731 | 2126864 | 2127746 | 7.00  | 1887>                                           |
|   | 2139538 | 2140070 | 2139566 | 2140054 | 2139553 | 2140038 | 4.72  | <5481                                           |
|   | 2239829 | 2240569 | 2239819 | 2240564 | 2239932 | 2240547 | 4.37  | 1977>                                           |
|   | 2256031 | 2257100 | 2256023 | 2257080 | 2256043 | 2257061 | 7.57  | 1990>                                           |
|   | 2257648 | 2258277 | 2257663 | 2258214 | 2257655 | 2258214 | 6.66  | 1990> + intergenic                              |
|   | 2285735 | 2286337 | 2285720 | 2286487 | 2285710 | 2286342 | 6.19  | 2014>                                           |
|   | 2294282 | 2295486 | 2294286 | 2295452 | 2294307 | 2295440 | 6.93  | 2020> <b>2021</b> >                             |
|   | 2370706 | 2372115 | 2370844 | 2372141 | 2370703 | 2372157 | 6.07  | 2080>                                           |
|   | 2411915 | 2413595 | 2411898 | 2413603 | 2411946 | 2413594 | 8.30  | 2113>(419bp)2114>                               |
|   | 2459815 | 2461187 | 2459773 | 2461163 | 2459834 | 2461105 | 4.22  | <2152< <b>2153</b> 2154>                        |
|   | 2476724 | 2477175 | 2476715 | 2477138 | 2476742 | 2477175 | 7.13  | 2170>                                           |
|   | 2501699 | 2502463 | 2501944 | 2502453 | 2501911 | 2502445 | 6.36  | 2195>                                           |
|   | 2525408 | 2529732 | 2525423 | 2529728 | 2525550 | 2529718 | 5.73  | 2214> <b>2215</b> > <b>2216</b> > <b>2217</b> > |
|   | 2530263 | 2531001 | 2530298 | 2530980 | 2530284 | 2530980 | 7.81  | 2218> <b>2219</b> >                             |
|   | 2541547 | 2542313 | 2541521 | 2542314 | 2541548 | 2542299 | 4.53  | 2234>                                           |
|   | 2584616 | 2585481 | 2584616 | 2585463 | 2584617 | 2585485 | 5.37  | <2265                                           |
|   | 2607496 | 2608233 | 2607487 | 2608223 | 2607498 | 2608226 | 8.71  | 2284>5514>                                      |
|   | 2622586 | 2623232 | 2622591 | 2623237 | 2622607 | 2623260 | 5.26  | 5516> <b>5517</b> >                             |
|   | 2676273 | 2677329 | 2676299 | 2677265 | 2676274 | 2677335 | 5.79  | <b>2345</b> > <b>2346</b> >2347>                |
|   | 2687646 | 2688278 | 2687623 | 2688122 | 2687646 | 2688110 | 7.08  | <2354< <b>2355</b> <2356                        |
|   | 2728175 | 2728563 | 2728230 | 2728573 | 2728229 | 2728551 | 6.46  | 2390>                                           |
|   | 2742155 | 2743204 | 2742175 | 2743177 | 2742154 | 2743135 | 9.02  | <b>2396</b> >2397>                              |
|   | 2783511 | 2784358 | 2783504 | 2784360 | 2783544 | 2784229 | 7.92  | 2437>                                           |
|   | 2850940 | 2851341 | 2850964 | 2851374 | 2850945 | 2851328 | 10.04 | <b>2504</b> >5530>                              |
|   | 2851512 | 2851951 | 2851536 | 2851951 | 2851515 | 2851864 | 6.94  | 5531>                                           |
|   | 2853095 | 2853409 | 2853032 | 2853437 | 2853059 | 2853447 | 6.35  | < <b>2505</b>                                   |
|   | 2869316 | 2869827 | 2869322 | 2869828 | 2869321 | 2869801 | 7.92  | 2522>                                           |
|   | 2925578 | 2926162 | 2925597 | 2926162 | 2925582 | 2926168 | 5.84  | <2564                                           |
|   | 2948632 | 2949185 | 2948671 | 2949182 | 2948664 | 2949159 | 6.79  | <2582                                           |
|   | 3009217 | 3009656 | 3009217 | 3009666 | 3009223 | 3009659 | 4.66  | 2629 ( <i>bcs</i> )>                            |
|   | 3024254 | 3024875 | 3024228 | 3024913 | 3024233 | 3024862 | 6.66  | < <b>2640</b> <2641                             |

|   |         |         |         |         |         |         |       |                        |
|---|---------|---------|---------|---------|---------|---------|-------|------------------------|
|   | 3070666 | 3071140 | 3070652 | 3071096 | 3070661 | 3071097 | 8.29  | 2681>2682>             |
|   | 3248449 | 3248981 | 3248421 | 3248985 | 3248458 | 3248983 | 6.30  | 2845>                  |
| C | 3253499 | 3253863 | 3253484 | 3253857 | 3253493 | 3253868 | 6.19  | <2851 <2852            |
|   | 3254136 | 3254775 | 3254267 | 3254777 | 3254285 | 3254716 | 7.77  | <2852                  |
|   | 3255790 | 3256476 | 3255532 | 3256673 | 3255792 | 3256446 | 5.74  | <2853                  |
|   | 3297128 | 3297629 | 3297140 | 3297629 | 3297140 | 3297608 | 5.87  | 2899><2900             |
| C | 3301626 | 3302421 | 3301626 | 3302395 | 3301626 | 3302389 | 6.21  | 2904>                  |
|   | 3302641 | 3303245 | 3302623 | 3303242 | 3302652 | 3303222 | 4.77  |                        |
|   | 3326375 | 3327133 | 3326608 | 3327123 | 3326577 | 3327061 | 6.26  | 2925><2926             |
|   | 3346002 | 3346526 | 3346013 | 3346523 | 3345956 | 3346510 | 4.36  | <2942                  |
|   | 3346658 | 3347330 | 3346658 | 3347133 | 3346660 | 3347082 | 9.39  | 2943>                  |
|   | 3400535 | 3401224 | 3400557 | 3401198 | 3400556 | 3401226 | 8.63  | <3006<3007             |
|   | 3401353 | 3402584 | 3401336 | 3402590 | 3401358 | 3402591 | 9.27  | 3010>                  |
|   | 3411956 | 3412659 | 3411866 | 3412655 | 3411928 | 3412694 | 6.18  | 5551><3025             |
|   | 3478007 | 3478712 | 3477951 | 3478708 | 3477951 | 3478702 | 6.15  | <3088<3089             |
|   | 3494414 | 3495016 | 3494424 | 3495020 | 3494484 | 3494987 | 10.72 | <3098<3099             |
|   | 3513733 | 3514231 | 3513731 | 3514166 | 3513747 | 3514158 | 8.68  | 3108>                  |
|   | 3515449 | 3516527 | 3515450 | 3516520 | 3515450 | 3516405 | 6.93  | 5576>                  |
|   | 3543601 | 3544512 | 3543770 | 3544517 | 3543645 | 3544456 | 8.86  | <3130                  |
|   | 3546568 | 3547036 | 3546559 | 3547033 | 3546531 | 3547033 | 8.02  | <3131                  |
|   | 3550018 | 3550745 | 3549962 | 3550656 | 3549996 | 3550707 | 5.41  | 3133>3134> (pea)       |
|   | 3553965 | 3555299 | 3554043 | 3555273 | 3554010 | 3555280 | 8.15  | 3139>                  |
|   | 3575617 | 3576427 | 3575691 | 3576425 | 3575617 | 3576418 | 5.16  | <3156                  |
|   | 3671289 | 3674517 | 3671271 | 3674528 | 3671288 | 3673992 | 5.08  | 3234>3235>3236>3237>   |
|   | 3703490 | 3703887 | 3703464 | 3703886 | 3703484 | 3703882 | 8.55  | <5597 (250 pb)         |
|   | 3721040 | 3722556 | 3721053 | 3722553 | 3721053 | 3722554 | 4.79  | <3287<5598             |
|   | 3748687 | 3750377 | 3748705 | 3750362 | 3748641 | 3750346 | 7.51  | <3311<3312<3313<3314   |
|   | 3772373 | 3773266 | 3772383 | 3773293 | 3772380 | 3773303 | 5.13  | 3332> 3333>            |
|   | 3825784 | 3826450 | 3825782 | 3826460 | 3825784 | 3826450 | 5.04  | <3380 (601pb)          |
|   | 3860372 | 3861240 | 3860358 | 3861109 | 3860383 | 3861077 | 7.00  | 3412>3413>             |
|   | 3867122 | 3867690 | 3867075 | 3867711 | 3867117 | 3867642 | 4.68  | 3416>                  |
|   | 3933808 | 3934172 | 3933817 | 3934153 | 3933806 | 3934142 | 7.94  | <3467                  |
|   | 3976895 | 3977308 | 3976934 | 3977335 | 3976904 | 3977335 | 6.58  | <3507                  |
|   | 3996007 | 3996340 | 3996013 | 3996339 | 3996011 | 3996341 | 6.58  | 3523>                  |
|   | 3998679 | 3999161 | 3998747 | 3999123 | 3998795 | 3999138 | 7.27  | <3527                  |
|   | 4002154 | 4002752 | 4002182 | 4002708 | 4002217 | 4002708 | 6.50  | 3530>                  |
|   | 4012728 | 4013666 | 4012717 | 4013670 | 4012868 | 4013687 | 6.49  | mr44>                  |
|   | 4021583 | 4023285 | 4021597 | 4023282 | 4021671 | 4023109 | 13.33 | <3547(66bp)<3548       |
|   | 4061873 | 4062693 | 4061911 | 4062672 | 4061914 | 4062645 | 5.70  | 3580><3581             |
|   | 4114292 | 4114846 | 4114328 | 4114835 | 4114277 | 4114778 | 10.16 | <3620                  |
|   | 4159962 | 4160928 | 4160012 | 4160914 | 4160114 | 4160939 | 5.93  | 3662><3663             |
|   | 4174621 | 4174987 | 4174638 | 4174990 | 4174621 | 4174962 | 7.96  | <3674                  |
|   | 4184157 | 4184899 | 4184190 | 4184882 | 4184188 | 4184881 | 8.08  | 3680>3681>             |
|   | 4197080 | 4197810 | 4197075 | 4197816 | 4197062 | 4197807 | 7.08  | <5620                  |
|   | 4244221 | 4245458 | 4244400 | 4245484 | 4244362 | 4245372 | 6.40  | <3721<3722             |
|   | 4272711 | 4273115 | 4272688 | 4273114 | 4272717 | 4273112 | 9.41  | 3743><3744             |
|   | 4289631 | 4290121 | 4289610 | 4290122 | 4289587 | 4290106 | 6.27  | <3761 (cfcA)           |
|   | 4295582 | 4296289 | 4295590 | 4296273 | 4295585 | 4296294 | 5.95  | 3765>                  |
|   | 4303196 | 4304433 | 4303196 | 4304452 | 4303225 | 4304469 | 8.05  | <3775<3776             |
|   | 4306151 | 4306878 | 4306073 | 4306879 | 4306191 | 4306921 | 5.19  | <3778                  |
|   | 4357790 | 4358788 | 4357840 | 4358790 | 4357840 | 4358789 | 5.25  | 3832(rsmE)><3833       |
|   | 4361794 | 4364305 | 4361791 | 4364269 | 4361794 | 4364279 | 5.23  | 3837><5634(434pb)3839> |
|   | 4411884 | 4412596 | 4411865 | 4412571 | 4411865 | 4412590 | 4.99  | 3986>3987>             |
|   | 4415769 | 4416120 | 4415782 | 4416125 | 4415779 | 4416125 | 9.15  | 3901>                  |
|   | 4416716 | 4417118 | 4416656 | 4417127 | 4416714 | 4417117 | 6.56  | <3904 3905>            |
|   | 4418296 | 4419165 | 4418411 | 4419154 | 4418286 | 4419151 | 8.09  | 3908><3909             |
|   | 4448629 | 4448995 | 4448638 | 4448980 | 4448655 | 4448988 | 7.26  | 3945>                  |
|   | 4472726 | 4474262 | 4472726 | 4474267 | 4473311 | 4474227 | 9.42  | 3962>(665bp)3963><3964 |
|   | 4480623 | 4481209 | 4480649 | 4481242 | 4480637 | 4481209 | 10.77 | 3972>                  |
|   | 4514497 | 4515267 | 4514653 | 4515273 | 4514655 | 4515250 | 4.57  | <4004                  |
|   | 4557609 | 4558023 | 4557660 | 4558012 | 4557669 | 4558024 | 7.70  | 4044><4045             |
|   | 4580158 | 4580473 | 4580162 | 4580485 | 4579906 | 4580473 | 6.02  | <4058<4059             |
|   | 4595471 | 4596298 | 4595497 | 4596252 | 4595512 | 4596249 | 5.33  | 4070><4071             |
|   | 4634770 | 4636323 | 4634839 | 4636268 | 4634881 | 4636304 | 5.92  | <4098<4099<4100        |
|   | 4636349 | 4637163 | 4636366 | 4637173 | 4636368 | 4637132 | 4.44  | <4101<4102             |
|   | 4643957 | 4644658 | 4643955 | 4644677 | 4643945 | 4644666 | 5.80  | 4108><4109             |
|   | 4663886 | 4666034 | 4663812 | 4666049 | 4664944 | 4666028 | 5.57  | 4125>4126>4127>4128    |
|   | 4685817 | 4686348 | 4685804 | 4686356 | 4685814 | 4686349 | 7.90  | 4147>                  |
|   | 4697323 | 4698086 | 4697592 | 4698091 | 4697612 | 4698071 | 6.90  | <4157<4158             |
|   | 4712193 | 4712973 | 4712313 | 4712853 | 4712303 | 4712829 | 7.15  | 4171>                  |
|   | 4721120 | 4722514 | 4720907 | 4723429 | 4721195 | 4722504 | 6.03  | <4178<4179             |

|   |         |         |         |         |         |         |      |                        |
|---|---------|---------|---------|---------|---------|---------|------|------------------------|
|   | 4752235 | 4752821 | 4752264 | 4752802 | 4752264 | 4752793 | 4.74 | <4207                  |
|   | 4835427 | 4835893 | 4835441 | 4835884 | 4835455 | 4835906 | 4.76 | <4249                  |
|   | 4855218 | 4855717 | 4855189 | 4855708 | 4855194 | 4855744 | 7.83 | 4270>                  |
|   | 4904820 | 4905208 | 4904820 | 4905345 | 4904823 | 4905425 | 8.91 | <4312 <4313            |
| b | 4907692 | 4908138 | 4907714 | 4908748 | 4907733 | 4908141 | 9.87 | <4317(277bp)4318>      |
|   | 4909310 | 4910803 | 4909308 | 4910823 | 4909324 | 4910760 | 7.02 | 4318>(477bp)<4319<4320 |
|   | 4951982 | 4953159 | 4951984 | 4953188 | 4951987 | 4953187 | 5.20 | <4361<4362<4363        |
|   | 4953857 | 4954762 | 4953898 | 4954798 | 4953879 | 4954753 | 6.04 | <4363<4364             |
|   | 4978832 | 4980180 | 4978875 | 4980172 | 4979097 | 4980169 | 5.74 | <4384<4385<4386        |
|   | 5042856 | 5043344 | 5042858 | 5043333 | 5042856 | 5043333 | 4.98 | 4447>4448>             |
|   | 5075688 | 5076277 | 5075691 | 5076282 | 5075689 | 5076240 | 9.02 | <t57 <4469             |
|   | 5079600 | 5080888 | 5079754 | 5080892 | 5079576 | 5080863 | 5.48 | <t53<t52<4472(rsmA)<73 |
|   | 5093608 | 5094427 | 5093623 | 5094433 | 5093643 | 5094435 | 6.14 | <4482<4483 (hisP)      |
|   | 5116912 | 5117573 | 5116912 | 5117612 | 5116930 | 5117591 | 4.79 | 4503>                  |
|   | 5157501 | 5158166 | 5157499 | 5158093 | 5157550 | 5158157 | 8.95 | 4541>4542>             |
| c | 5158516 | 5158898 | 5158518 | 5159043 | 5158554 | 5158816 | 6.92 | 4542>                  |
|   | 5159142 | 5159788 | 5159224 | 5159793 | 5159296 | 5159785 | 6.15 |                        |
|   | 5180407 | 5181107 | 5180422 | 5181080 | 5180417 | 5181076 | 6.85 | 4558><4559<4560        |
|   | 5190296 | 5191437 | 5190301 | 5191415 | 5190281 | 5191429 | 5.31 | <4571                  |
|   | 5204175 | 5204688 | 5204154 | 5204681 | 5204210 | 5204690 | 4.16 | 4584> 4585>            |
|   | 5212154 | 5212846 | 5212175 | 5212766 | 5212125 | 5212850 | 7.71 | 4593><4594             |
|   | 5222314 | 5222770 | 5222300 | 5222769 | 5222314 | 5222788 | 4.93 | <4602                  |
|   | 5249189 | 5249880 | 5249125 | 5249863 | 5249164 | 5249860 | 7.78 | <4624                  |
|   | 5286903 | 5287334 | 5286909 | 5287302 | 5286923 | 5287306 | 5.61 | <4659                  |
|   | 5316056 | 5317178 | 5316058 | 5317193 | 5316059 | 5317163 | 4.98 | <4678<4679             |
|   | 5325015 | 5325595 | 5325053 | 5325594 | 5325064 | 5325595 | 6.96 | 4685>mr52><4686        |
|   | 5328807 | 5329383 | 5329073 | 5329391 | 5328808 | 5329400 | 6.32 | <4689 4690>            |
| c | 5347487 | 5348090 | 5347487 | 5348089 | 5347486 | 5348101 | 7.95 | 4704>                  |
|   | 5348439 | 5348904 | 5348461 | 5348849 | 5348459 | 5348843 | 5.26 |                        |
|   | 5351310 | 5351809 | 5351346 | 5351807 | 5351345 | 5351773 | 5.55 | <4707                  |
|   | 5372715 | 5373297 | 5372705 | 5373308 | 5372755 | 5373296 | 5.20 | <4724 mr_55>           |
|   | 5430426 | 5431255 | 5430428 | 5431256 | 5430427 | 5431256 | 6.79 | <4770                  |
|   | 5435513 | 5436120 | 5435531 | 5436131 | 5435531 | 5436105 | 4.57 | 4773>4774>             |
|   | 5455188 | 5456020 | 5455172 | 5456020 | 5455186 | 5456014 | 5.03 | <4792 <4793            |
|   | 5458625 | 5459635 | 5458703 | 5459627 | 5458708 | 5459623 | 8.46 | 4794>4795>4796>        |
|   | 5483549 | 5484189 | 5483567 | 5484199 | 5483675 | 5484182 | 6.68 | 4822>                  |
|   | 5485839 | 5486710 | 5485928 | 5486701 | 5485957 | 5486701 | 6.20 | 4823> 4824>            |
|   | 5488484 | 5489549 | 5488544 | 5489540 | 5488544 | 5489518 | 7.77 | 4824>                  |
|   | 5555087 | 5555544 | 5555121 | 5555548 | 5555071 | 5555540 | 9.03 | <4887                  |
|   | 5592474 | 5592930 | 5592495 | 5592884 | 5592492 | 5592893 | 7.05 | 4920><4921             |
|   | 5613042 | 5613709 | 5612993 | 5613661 | 5613030 | 5613875 | 7.36 | 4933>                  |
|   | 5650689 | 5651253 | 5650700 | 5651278 | 5650704 | 5651301 | 7.02 | <4959 (cfcR)           |
|   | 5655640 | 5656486 | 5655635 | 5656478 | 5655640 | 5656449 | 4.87 | <4965                  |
|   | 5664430 | 5664880 | 5664401 | 5664885 | 5664422 | 5664864 | 4.96 | <4972<4973             |
|   | 5681935 | 5682416 | 5681890 | 5682399 | 5681934 | 5682399 | 6.38 | <4987<4988             |
|   | 5695689 | 5696600 | 5695801 | 5696591 | 5695787 | 5696549 | 7.18 | 4999>                  |
|   | 5696759 | 5697883 | 5696742 | 5697527 | 5696781 | 5697512 | 7.14 | 5000>5001>             |
|   | 5699355 | 5700267 | 5699365 | 5700267 | 5699373 | 5700269 | 6.67 | 5003>                  |
|   | 5759516 | 5760088 | 5759501 | 5760077 | 5759513 | 5760082 | 5.30 | <5053<5054             |
|   | 5781405 | 5782114 | 5781358 | 5782114 | 5781453 | 5782142 | 9.96 | 5067>                  |
|   | 5800674 | 5801620 | 5800939 | 5801617 | 5801002 | 5801593 | 7.13 | <5078<5079<5080        |
|   | 5804854 | 5805658 | 5804844 | 5805640 | 5804844 | 5805388 | 8.25 | <5083 5084>            |
|   | 5821870 | 5823163 | 5821870 | 5823130 | 5821882 | 5823130 | 6.23 | 5098>5099>5100>        |
|   | 5845434 | 5846052 | 5845437 | 5846038 | 5845437 | 5846037 | 5.46 | 5123>5124><5125        |
|   | 5851948 | 5853716 | 5851948 | 5853746 | 5851956 | 5853647 | 8.12 | <5129<5120             |
|   | 5892753 | 5893273 | 5892758 | 5893281 | 5892799 | 5893297 | 8.00 | <5167                  |
|   | 5896282 | 5897092 | 5896292 | 5896825 | 5896295 | 5896807 | 9.03 | <5171                  |
|   | 5913275 | 5914200 | 5913521 | 5914199 | 5913544 | 5914201 | 5.49 | 5184>                  |
|   | 5923798 | 5924466 | 5923803 | 5924473 | 5923803 | 5924488 | 4.57 | <5192                  |
|   | 5931034 | 5931696 | 5931018 | 5931717 | 5931092 | 5931685 | 4.97 | <5199                  |
|   | 5941939 | 5942546 | 5941960 | 5942527 | 5941958 | 5942516 | 5.79 | <5222 <5209            |
|   | 5944819 | 5945783 | 5944889 | 5945774 | 5945016 | 5945773 | 5.81 | <5212<5213             |
|   | 5949196 | 5949739 | 5949231 | 5949706 | 5949253 | 5949781 | 4.87 | 5216>                  |
|   | 5954026 | 5954533 | 5954017 | 5954510 | 5954106 | 5954490 | 7.18 | <5219                  |
|   | 5965491 | 5966145 | 5965501 | 5966159 | 5965491 | 5966113 | 5.81 | 5231><5232             |
|   | 5970884 | 5971338 | 5970847 | 5971314 | 5970847 | 5971319 | 7.13 | <5236                  |
|   | 6002374 | 6003944 | 6002389 | 6003934 | 6002376 | 6003935 | 5.09 | <5258 (amaB)           |
|   | 6022664 | 6023510 | 6022674 | 6023471 | 6022757 | 6023471 | 5.58 | 5273><5274             |
|   | 6060949 | 6061445 | 6060948 | 6061430 | 6060950 | 6061427 | 5.27 | <5313                  |
|   | 6064271 | 6065040 | 6064272 | 6065067 | 6064272 | 6065052 | 4.91 | 5318><5319             |
|   | 6079485 | 6080187 | 6079475 | 6080203 | 6079486 | 6080176 | 4.81 | 5331> 5332>            |



|         |         |         |         |         |         |       |                                 |
|---------|---------|---------|---------|---------|---------|-------|---------------------------------|
| 6081316 | 6081857 | 6081320 | 6081842 | 6081446 | 6081842 | 5.45  | <5334< <b>5333</b>              |
| 6089350 | 6089939 | 6089348 | 6089937 | 6089342 | 6089970 | 5.37  | 5341>                           |
| 6113605 | 6114372 | 6113553 | 6114376 | 6113558 | 6114235 | 6.53  | 5364><5365                      |
| 6128212 | 6128573 | 6128200 | 6128610 | 6128198 | 6128561 | 7.71  | intergenic 920 bp               |
| 6130955 | 6131951 | 6130916 | 6131949 | 6130948 | 6131951 | 9.63  | <5379< <b>5732</b> <5380        |
| 6134313 | 6134853 | 6134329 | 6134827 | 6134306 | 6134851 | 10.43 | <5382                           |
| 6150907 | 6152899 | 6150903 | 6152902 | 6150908 | 6152882 | 4.51  | <b>5395</b> > <b>5737</b> >5738 |

| RsmI; -10logPval > 145; fold enrichment ≥ 2.5 |         |         |         |              |                                    |  |
|-----------------------------------------------|---------|---------|---------|--------------|------------------------------------|--|
| RsmI1                                         |         | RsmI2   |         | average Fold | 209 [206] targets                  |  |
| start                                         | end     | start   | end     | enr.         | locus PP_                          |  |
| 23967                                         | 25403   | 24003   | 25339   | 2.71         | 0018>0019>0020>                    |  |
| 60863                                         | 61258   | 60870   | 61704   | 3.33         | 0052>                              |  |
| 61838                                         | 62630   | 61830   | 62711   | 3.68         | 0053>                              |  |
| 73521                                         | 74926   | 73541   | 75427   | 7.62         | <b>0063</b> ><64                   |  |
| 94468                                         | 94936   | 94483   | 94954   | 4.70         | 0084>< <b>0085</b>                 |  |
| 95600                                         | 96671   | 95639   | 96670   | 3.66         | <0088                              |  |
| 108692                                        | 111857  | 108713  | 111926  | 2.90         | <b>0103</b> >0104>                 |  |
| 112014                                        | 113302  | 111962  | 113288  | 2.73         | 106><5427                          |  |
| 146916                                        | 148103  | 146951  | 147385  | 3.56         | <b>0138</b> ><0139                 |  |
| 155511                                        | 155919  | 155504  | 155921  | 5.16         | <0146                              |  |
| 168426                                        | 169396  | 169598  | 169940  | 3.56         | 0158>159>                          |  |
| 171363                                        | 172942  | 171080  | 172941  | 7.16         | 16SA (rRNA)>                       |  |
| 173180                                        | 176096  | 173072  | 176142  | 6.66         | 23SA (rRNA)>                       |  |
| 176804                                        | 178370  | 176522  | 178371  | 7.28         | 5SA (rRNA)>                        |  |
| 178610                                        | 181527  | 178488  | 181523  | 6.84         | 23SB (rRNA)>                       |  |
| 224781                                        | 225650  | 225006  | 225629  | 3.78         | <0173                              |  |
| 233489                                        | 234200  | 233442  | 234211  | 3.20         | 0180>< <b>0181</b> <0182           |  |
| 253825                                        | 254214  | 253820  | 254221  | 4.05         | <0203                              |  |
| 351543                                        | 352649  | 351539  | 352654  | 5.73         | <b>0292</b> >0293>                 |  |
| 355003                                        | 356480  | 354985  | 356504  | 2.71         | <0295< <b>0296</b>                 |  |
| 358292                                        | 359323  | 358292  | 359266  | 2.99         | 0298>                              |  |
| 369410                                        | 372740  | 368898  | 372740  | 3.11         | 0308> <b>0309</b> > <b>0310</b> >  |  |
| 389257                                        | 394363  | 389206  | 394394  | 3.33         | 0325> <b>0326</b> > <b>0327</b> >  |  |
| 432998                                        | 435305  | 432972  | 435361  | 2.84         | <0356                              |  |
| 448800                                        | 451021  | 448830  | 450490  | 6.88         | <b>0370</b> > <b>mr05 (rsmY)</b> > |  |
| 506298                                        | 507117  | 506267  | 507099  | 4.11         | 0417>                              |  |
| 524920                                        | 526504  | 524635  | 526501  | 6.10         | 16SC (rRNA)>                       |  |
| 526763                                        | 529660  | 526617  | 529695  | 5.91         | 23SC (rRNA)>                       |  |
| 579158                                        | 580848  | 579152  | 580797  | 2.94         | 0491> <b>0492</b> >                |  |
| 606159                                        | 606942  | 606167  | 606944  | 3.64         | 0521>                              |  |
| 634629                                        | 635239  | 634444  | 635110  | 3.40         | 0546>                              |  |
| 637745                                        | 638820  | 637768  | 638826  | 2.89         | 0549><0550                         |  |
| 639529                                        | 639963  | 639514  | 639989  | 3.56         | <0551                              |  |
| 655567                                        | 656395  | 655305  | 656398  | 3.28         | < <b>0563 (gcbA)</b>               |  |
| 666033                                        | 666686  | 666067  | 666728  | 3.37         | 0570>                              |  |
| 694148                                        | 695862  | 694146  | 695865  | 3.87         | <b>0596</b> >0597>                 |  |
| 695982                                        | 696580  | 695917  | 696503  | 2.99         | 0597>                              |  |
| 697805                                        | 699339  | 697410  | 699378  | 6.49         | 16SD (rRNA)>                       |  |
| 699863                                        | 702795  | 699706  | 702756  | 6.55         | 23SD (rRNA)>                       |  |
| 733840                                        | 735320  | 733825  | 735320  | 3.82         | <0626                              |  |
| 751809                                        | 752789  | 751783  | 752786  | 2.83         | 5451><0641                         |  |
| 761997                                        | 762541  | 762137  | 762601  | 3.61         | 0654>                              |  |
| 826787                                        | 828406  | 826751  | 828493  | 4.08         | <b>0711</b> > <b>0712</b> >0713>   |  |
| 974625                                        | 975229  | 974647  | 975226  | 3.22         | 0837>                              |  |
| 1048107                                       | 1048912 | 1048107 | 1048961 | 5.65         | <0906< <b>0907</b>                 |  |
| 1158064                                       | 1158426 | 1158081 | 1158462 | 3.82         | 1015>                              |  |
| 1177974                                       | 1178719 | 1177913 | 1178702 | 3.52         | 1032>                              |  |
| 1231808                                       | 1232663 | 1231780 | 1232678 | 5.15         | <1073                              |  |
| 1319736                                       | 1320680 | 1319745 | 1320824 | 2.72         | 1153>< <b>1154</b>                 |  |
| 1325380                                       | 1327058 | 1325218 | 1327069 | 6.04         | 16SE (rRNA)                        |  |
| 1327188                                       | 1330211 | 1327172 | 1330224 | 6.29         | 23SE (rRNA)                        |  |
| 1360097                                       | 1361988 | 1360083 | 1362061 | 2.86         | <b>1185</b> > 1186>1187>           |  |
| 1375793                                       | 1376670 | 1376112 | 1376710 | 4.47         | 1200><1201                         |  |
| 1388724                                       | 1389812 | 1388759 | 1389808 | 2.81         | 1210> 1211>                        |  |
| 1425348                                       | 1425658 | 1425367 | 1425701 | 4.76         | 1249>                              |  |
| 1495689                                       | 1496512 | 1495624 | 1496449 | 2.71         | 1308>                              |  |
| 1537939                                       | 1538635 | 1537797 | 1538628 | 3.42         | < <b>1349</b> <1350                |  |
| 1566326                                       | 1567319 | 1566340 | 1567447 | 5.01         | 1375>                              |  |

|   |         |         |         |         |      |                                           |
|---|---------|---------|---------|---------|------|-------------------------------------------|
|   | 1573953 | 1575015 | 1573939 | 1575028 | 2.65 | 1380>1381><1382                           |
|   | 1635320 | 1635790 | 1635189 | 1635769 | 3.90 | 1434>                                     |
|   | 1642282 | 1644701 | 1642277 | 1644696 | 3.96 | <1443                                     |
|   | 1644892 | 1647302 | 1644901 | 1646419 | 3.74 | <1444                                     |
|   | 1685779 | 1686695 | 1685439 | 1686778 | 2.73 | <1481                                     |
|   | 1695940 | 1696516 | 1695818 | 1696569 | 4.39 | 1491> <b>1492</b> >                       |
|   | 1698159 | 1698700 | 1697845 | 1698751 | 3.36 | 1493>                                     |
|   | 1704616 | 1706263 | 1704618 | 1706330 | 3.30 | <b>1499</b> >1500>                        |
|   | 1707256 | 1708661 | 1707253 | 1708667 | 3.24 | <1502<1503                                |
|   | 1719203 | 1720054 | 1719203 | 1720034 | 5.83 | <1515                                     |
|   | 1766446 | 1766896 | 1766442 | 1766876 | 4.72 | 1577>                                     |
|   | 1787451 | 1789007 | 1787625 | 1789006 | 2.76 | 1593> <b>1594</b> >1595>                  |
|   | 1835623 | 1836312 | 1835623 | 1836310 | 3.42 | <1640                                     |
|   | 1854933 | 1859168 | 1854945 | 1859160 | 3.63 | 1659>1660>1661>                           |
|   | 1879213 | 1880317 | 1879236 | 1880201 | 4.70 | 1686><1687                                |
|   | 1897608 | 1898106 | 1897477 | 1898124 | 4.32 | <1702                                     |
|   | 1925665 | 1926965 | 1925679 | 1926966 | 2.73 | <1725< <b>1726</b>                        |
|   | 2026484 | 2026992 | 2026412 | 2026905 | 4.12 | 1803>                                     |
|   | 2031362 | 2032293 | 2031433 | 2032300 | 3.76 | <1807                                     |
|   | 2039853 | 2040522 | 2039849 | 2040507 | 4.25 | 1813><1814                                |
| b | 2085772 | 2086410 | 2085769 | 2086417 | 5.52 | 1865>                                     |
|   | 2086888 | 2087544 | 2086864 | 2087554 | 6.01 | 1865>intergenic 65-66                     |
|   | 2087547 | 2088172 | 2087638 | 2088121 | 7.35 | intergenic 1865/66                        |
|   | 2126850 | 2127813 | 2126859 | 2127817 | 5.30 | 1887>                                     |
|   | 2139514 | 2140075 | 2139519 | 2140075 | 3.12 | <5481                                     |
|   | 2256526 | 2257175 | 2256525 | 2257211 | 4.39 | 1990>                                     |
|   | 2285735 | 2286220 | 2285755 | 2286309 | 3.52 | 2014>                                     |
|   | 2289149 | 2289956 | 2289149 | 2290392 | 3.00 | 2017>                                     |
|   | 2294300 | 2295443 | 2294316 | 2295448 | 3.39 | 2020> <b>2021</b> >                       |
|   | 2369092 | 2372135 | 2369528 | 2372134 | 3.34 | 2080>                                     |
|   | 2411880 | 2413717 | 2411899 | 2413692 | 4.46 | 2113>(419bp)2114>                         |
|   | 2501701 | 2502374 | 2501697 | 2502511 | 3.64 | 2195>                                     |
|   | 2506944 | 2507385 | 2507552 | 2508061 | 3.86 | <2201                                     |
|   | 2524966 | 2529815 | 2523877 | 2529813 | 4.14 | <b>2214</b> >15>16>17>(405bp)18>          |
|   | 2530270 | 2530961 | 2530281 | 2530933 | 4.94 | 2218> 2219>                               |
|   | 2548659 | 2550241 | 2548412 | 2550242 | 6.28 | 16SF (rRNA)                               |
|   | 2550729 | 2553646 | 2550572 | 2553644 | 6.41 | 23SF (rRNA)                               |
|   | 2584610 | 2585448 | 2584616 | 2585468 | 3.21 | <2265                                     |
|   | 2657642 | 2658090 | 2657641 | 2658313 | 3.46 | <2330                                     |
|   | 2668194 | 2672333 | 2668184 | 2672345 | 2.89 | 2338>< <b>2339</b>                        |
|   | 2676326 | 2677230 | 2676334 | 2676971 | 2.77 | <b>2345</b> > <b>2346</b> >2347>          |
|   | 2742170 | 2743129 | 2742175 | 2743181 | 5.45 | <b>2396</b> >2397>                        |
|   | 2755088 | 2755490 | 2755077 | 2755531 | 4.87 | 2410>                                     |
|   | 2783482 | 2784338 | 2783504 | 2784709 | 5.75 | 2437>                                     |
|   | 2788800 | 2789237 | 2788800 | 2789246 | 4.59 | 2440>                                     |
|   | 2869286 | 2869897 | 2869311 | 2869921 | 5.40 | 2522>                                     |
|   | 2939506 | 2940482 | 2939514 | 2940481 | 3.38 | <2572<2573                                |
|   | 3024234 | 3024879 | 3024139 | 3024908 | 4.41 | < <b>2640</b> <2641                       |
|   | 3070651 | 3071192 | 3070649 | 3071194 | 5.36 | <b>2681</b> >2682>                        |
|   | 3114664 | 3115259 | 3114730 | 3115191 | 5.12 | 2730> <b>2731</b> >                       |
|   | 3248430 | 3248960 | 3248467 | 3248992 | 4.11 | 2845>                                     |
|   | 3254217 | 3254804 | 3254070 | 3254900 | 5.65 | <2852                                     |
|   | 3326681 | 3327240 | 3326574 | 3327253 | 3.87 | 2925>< <b>2926</b>                        |
|   | 3344589 | 3346538 | 3344581 | 3346531 | 3.11 | <2941< <b>2942</b>                        |
|   | 3349590 | 3350687 | 3349633 | 3350897 | 3.23 | 2945>                                     |
|   | 3387198 | 3388080 | 3387196 | 3387881 | 5.47 | 2989>                                     |
|   | 3400573 | 3401194 | 3400579 | 3401192 | 4.40 | <3007                                     |
|   | 3401366 | 3401832 | 3401371 | 3401838 | 3.53 | <b>3008</b> > 3009>                       |
|   | 3402134 | 3402574 | 3402157 | 3402555 | 5.32 | 3010>                                     |
|   | 3412013 | 3412429 | 3411976 | 3412429 | 3.68 | <3025                                     |
|   | 3450153 | 3450659 | 3450168 | 3450655 | 3.30 | <5558                                     |
|   | 3455188 | 3457239 | 3454768 | 3457257 | 2.71 | <3071< <b>3072</b> <3073                  |
|   | 3477468 | 3478904 | 3477456 | 3478928 | 3.88 | <3088< <b>3089</b> <3090                  |
|   | 3487605 | 3489385 | 3487392 | 3489413 | 3.50 | <3093< <b>3094</b> <3095                  |
|   | 3494351 | 3496818 | 3494331 | 3497550 | 2.61 | <3098< <b>99</b> <100<5562                |
|   | 3513180 | 3514941 | 3513107 | 3514865 | 3.86 | 3108>                                     |
|   | 3543556 | 3544548 | 3543506 | 3544548 | 4.67 | <3130                                     |
|   | 3553994 | 3555353 | 3553974 | 3555346 | 3.75 | 3139>                                     |
|   | 3575570 | 3576428 | 3575494 | 3576454 | 2.96 | <3156                                     |
|   | 3623243 | 3623667 | 3623152 | 3623656 | 5.04 | <3194                                     |
|   | 3671296 | 3674497 | 3671302 | 3673871 | 3.42 | 3234> <b>35</b> > <b>36</b> > <b>37</b> > |

|   |         |         |         |         |      |                                      |
|---|---------|---------|---------|---------|------|--------------------------------------|
|   | 3721182 | 3722529 | 3721203 | 3722554 | 3.52 | <3287<5598                           |
|   | 3724863 | 3726626 | 3724899 | 3726637 | 2.90 | 3290>3291>                           |
|   | 3748560 | 3750347 | 3748613 | 3750383 | 4.95 | <3311 <12 <13<14                     |
|   | 3761043 | 3761588 | 3761088 | 3761587 | 5.23 | 3325>                                |
|   | 3860392 | 3861274 | 3860375 | 3861295 | 3.88 | <b>3412&gt;3413&gt;</b>              |
|   | 3907573 | 3908322 | 3907578 | 3908323 | 4.85 | 3448> <b>3449</b> >3450>             |
|   | 3924820 | 3925303 | 3924796 | 3925278 | 3.89 | <5602                                |
|   | 3976822 | 3977329 | 3976637 | 3977333 | 5.12 | <3506<3507                           |
|   | 3995989 | 3996368 | 3995974 | 3996362 | 5.47 | 3523>                                |
|   | 4013152 | 4013676 | 4013149 | 4013687 | 3.22 | mr44>                                |
|   | 4021953 | 4023071 | 4022177 | 4023038 | 8.69 | <3547(66bp)<3548                     |
|   | 4061890 | 4062740 | 4061883 | 4062751 | 3.02 | 3580><3581                           |
|   | 4114268 | 4114850 | 4114268 | 4114908 | 5.83 | <3620                                |
|   | 4144211 | 4144801 | 4144218 | 4145057 | 3.06 | 3648>3649>                           |
|   | 4160223 | 4160901 | 4159968 | 4160900 | 2.89 | 3662><3663                           |
|   | 4197115 | 4197615 | 4197112 | 4197713 | 3.05 | intergenic 3688/89(2491bp)           |
|   | 4289586 | 4290154 | 4289565 | 4290203 | 4.41 | <3761 ( <i>cfcA</i> )                |
|   | 4295638 | 4296256 | 4295610 | 4296253 | 2.84 | 3765>                                |
|   | 4321156 | 4321834 | 4321158 | 4321821 | 4.59 | 5629>                                |
|   | 4357787 | 4358768 | 4357778 | 4358768 | 3.31 | <b>3832(<i>rsmE</i>)&gt;&lt;3833</b> |
|   | 4361866 | 4362796 | 4361872 | 4364332 | 3.65 | <b>3837&gt;&lt;5634</b>              |
|   | 4415759 | 4416133 | 4415758 | 4416122 | 5.40 | 3901>                                |
|   | 4416654 | 4417141 | 4416654 | 4417141 | 4.43 | < <b>3904</b> 3905>                  |
|   | 4418396 | 4419146 | 4418411 | 4419150 | 4.53 | 3908><3909                           |
|   | 4473398 | 4473876 | 4473369 | 4473873 | 4.64 | 3963>                                |
|   | 4480654 | 4481212 | 4480634 | 4481192 | 6.49 | 3972>                                |
|   | 4579730 | 4580515 | 4579265 | 4580527 | 3.33 | <4058                                |
|   | 4595485 | 4596280 | 4595477 | 4596313 | 3.25 | <b>4070&gt;&lt;4071</b>              |
|   | 4635023 | 4636284 | 4635003 | 4636281 | 3.42 | <4098< <b>4099</b> <4100             |
|   | 4858679 | 4859133 | 4858717 | 4859178 | 3.01 | <4274                                |
|   | 4866696 | 4869935 | 4866743 | 4869961 | 3.01 | 4278>                                |
| b | 4908155 | 4908873 | 4908165 | 4908877 | 5.20 | 4318>                                |
|   | 4909254 | 4910951 | 4909278 | 4910944 | 5.27 | <b>4318&gt;(477bp)&lt;4319</b> <4320 |
|   | 4925086 | 4925614 | 4925089 | 4925613 | 3.78 | <4335                                |
|   | 4951699 | 4953172 | 4951700 | 4953611 | 2.79 | <4361< <b>4362</b> <4363             |
|   | 4967880 | 4970341 | 4967838 | 4970352 | 2.60 | <4377<4378                           |
|   | 4980609 | 4981317 | 4980596 | 4981329 | 2.81 | <4388                                |
|   | 5075733 | 5076242 | 5075728 | 5076218 | 3.35 | < <b>t63</b> <4469                   |
|   | 5106961 | 5107380 | 5106564 | 5107716 | 3.50 | <4493                                |
|   | 5157625 | 5158095 | 5157640 | 5158129 | 4.15 | <b>4541&gt;4542&gt;</b>              |
|   | 5158520 | 5159782 | 5158479 | 5159091 | 4.03 | 4542>                                |
|   | 5180389 | 5181067 | 5180388 | 5181120 | 4.20 | 4558>< <b>4559</b> <4560             |
|   | 5190292 | 5191418 | 5190321 | 5191416 | 2.92 | <4571                                |
|   | 5212176 | 5212809 | 5212169 | 5212821 | 4.26 | <b>4593&gt;&lt;4594</b>              |
|   | 5291515 | 5294442 | 5291460 | 5294429 | 2.88 | 4665>< <b>4666</b> <4667             |
|   | 5307697 | 5310592 | 5307694 | 5310725 | 6.63 | 23SG (rRNA)                          |
|   | 5311130 | 5312800 | 5311161 | 5312974 | 5.64 | 16SG (rRNA)                          |
|   | 5324996 | 5325589 | 5325054 | 5325584 | 4.72 | <b>4685&gt;mr52&gt;&lt;4686</b>      |
|   | 5338217 | 5338729 | 5338211 | 5338727 | 3.53 | mr53>                                |
|   | 5344626 | 5345714 | 5344603 | 5345517 | 2.76 | 4702>                                |
|   | 5367495 | 5371301 | 5367483 | 5371290 | 2.67 | 4720>< <b>4721</b> <22<23            |
|   | 5425083 | 5425447 | 5425094 | 5425466 | 4.82 | 4764>                                |
|   | 5430406 | 5431243 | 5430411 | 5431232 | 3.57 | <4770                                |
|   | 5455467 | 5456065 | 5455484 | 5456045 | 3.43 | <4792< <b>4793</b>                   |
|   | 5458640 | 5459614 | 5458459 | 5459608 | 5.19 | 4794> <b>4795</b> >4796>             |
|   | 5488472 | 5489411 | 5488425 | 5489432 | 4.14 | 4824>                                |
|   | 5523930 | 5524879 | 5523934 | 5524861 | 5.18 | <4857                                |
|   | 5531175 | 5531611 | 5531189 | 5531656 | 3.75 | <4865                                |
|   | 5546093 | 5548317 | 5546083 | 5548332 | 2.66 | <4879<4880                           |
|   | 5592473 | 5592891 | 5592516 | 5592913 | 3.85 | 4920>                                |
|   | 5650120 | 5651262 | 5650118 | 5651260 | 3.34 | < <b>4959</b> ( <i>cfcR</i> )        |
|   | 5681741 | 5682662 | 5681666 | 5682432 | 4.05 | <4987<4988                           |
|   | 5696718 | 5698771 | 5696734 | 5698791 | 2.77 | 5000>5001>                           |
|   | 5699381 | 5700330 | 5699384 | 5700383 | 2.70 | 5003>                                |
|   | 5704537 | 5705800 | 5704537 | 5705777 | 2.73 | <5007<5008                           |
|   | 5781524 | 5782099 | 5781285 | 5782100 | 5.22 | 5067>                                |
|   | 5800868 | 5801619 | 5800867 | 5801606 | 4.66 | <5078< <b>5079</b> <5080             |
|   | 5804820 | 5805476 | 5804839 | 5805381 | 5.11 | < <b>5083</b> 5084>                  |
|   | 5821823 | 5823516 | 5821799 | 5823564 | 5.00 | 5098> <b>5099</b> >5100>             |
|   | 5851906 | 5852628 | 5852185 | 5852620 | 5.36 | <5129< <b>5720</b>                   |
|   | 5930842 | 5931805 | 5930818 | 5932048 | 3.10 | <5199                                |

|         |         |         |         |      |                       |
|---------|---------|---------|---------|------|-----------------------|
| 5936420 | 5938634 | 5936428 | 5938646 | 2.81 | 5206>5207>            |
| 5941863 | 5942565 | 5941870 | 5942550 | 4.40 | <5722 <5209           |
| 5944727 | 5945874 | 5944741 | 5945987 | 3.95 | <5212<5213            |
| 5953853 | 5954775 | 5953560 | 5954890 | 4.53 | 5218><5219            |
| 5965223 | 5966113 | 5965282 | 5966146 | 3.70 | 5231><5232            |
| 6002366 | 6003938 | 6002357 | 6003925 | 2.76 | <5258 ( <i>amaB</i> ) |
| 6047749 | 6048206 | 6047729 | 6048230 | 4.13 | 5300>                 |
| 6113477 | 6114553 | 6113522 | 6114537 | 5.54 | 5364><5365            |
| 6150911 | 6152846 | 6150950 | 6152880 | 2.62 | 5395>5396>5397>       |

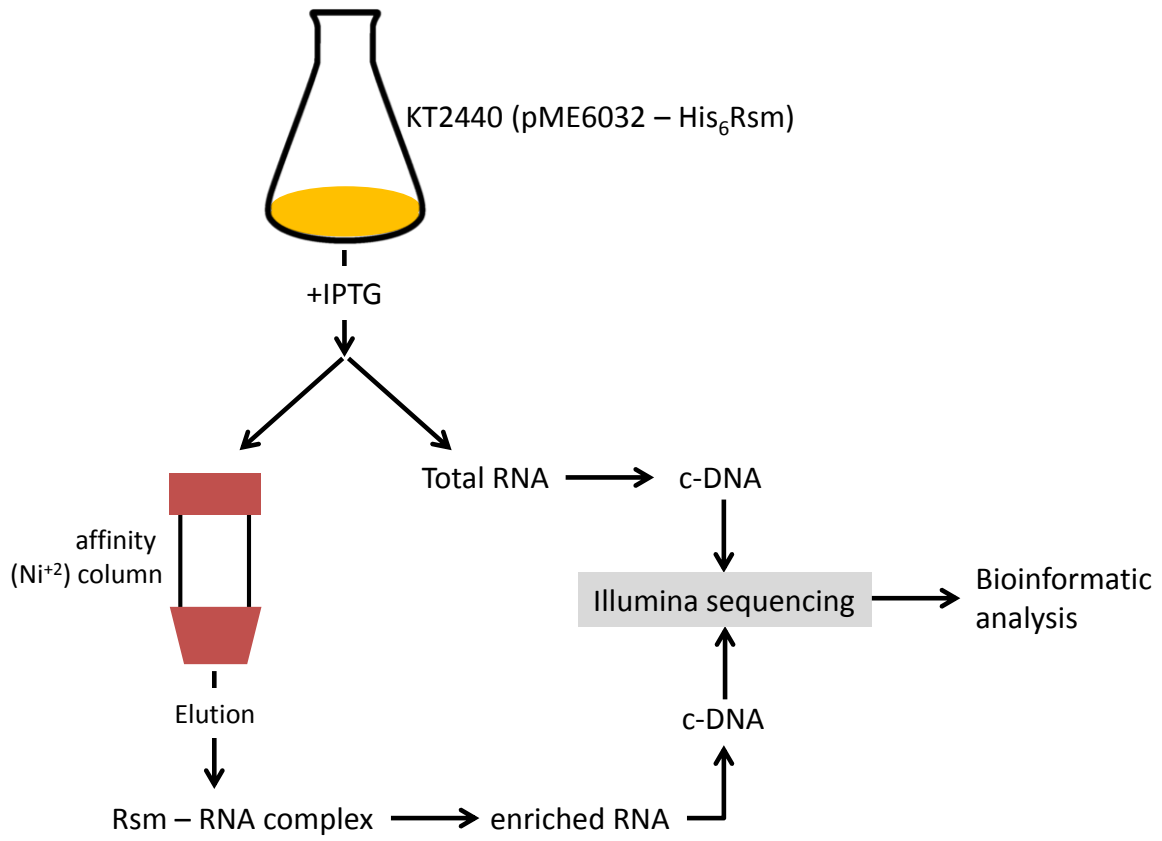

**Figure S1.** Schematic representation of the method used to identify Rsm-bound RNA sequences. See text for details.

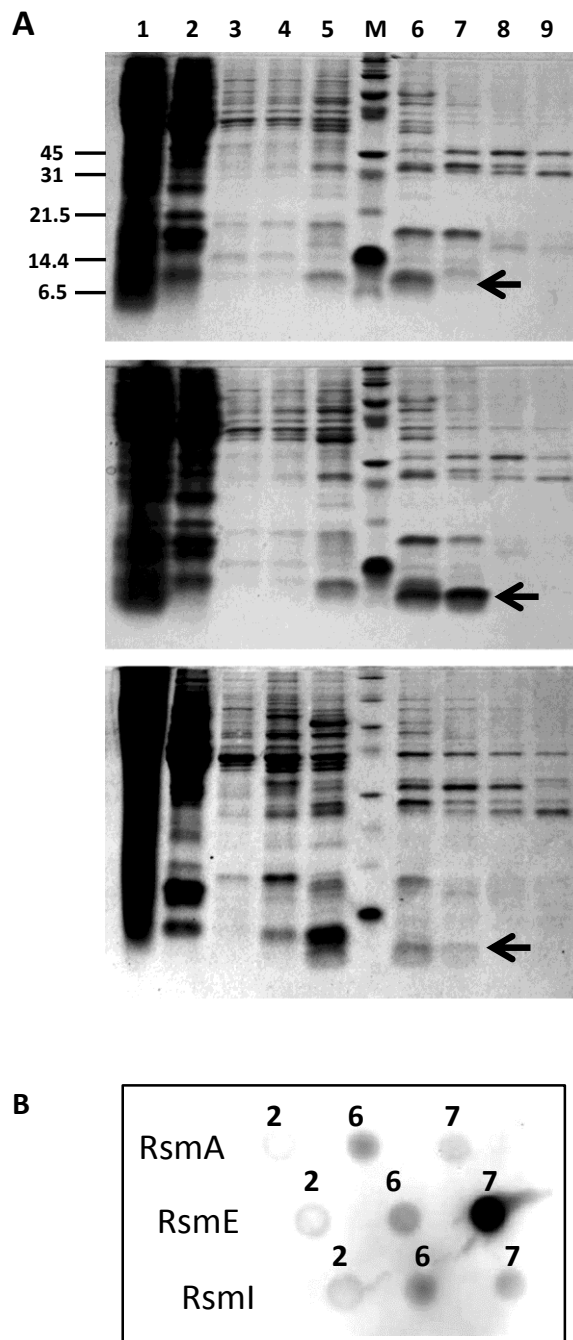

**Figure S2. A.** SDS-PAGE of fractions recovered by affinity purification of His<sub>6</sub>-Rsm proteins from IPTG-induced KT2440 cultures harboring pME6032-*rsmA* (top) pME6032-*rsmE* (middle), and pME6032-*rsmI* (bottom). Lanes: 1, samples before injection in HisTrap columns (Amersham Bioscience); 2, elution with 7% imidazole; 3-9, fractions recovered in the 7-100% range of imidazole concentrations. Arrows indicate the bands possibly corresponding to Rsm proteins. **B.** Detection of His<sub>6</sub>-Rsm proteins by dot blot. Twenty  $\mu$ L of the indicated samples (equivalent to the lanes in A) were spotted on an activated PVDF membrane and a monoclonal His-tag antibody (Invitrogen), diluted 1/5000 was used for chemiluminescence detection in a Bio-Rad ChemiDoc with ECL (Pierce) after incubation with a HRP-conjugated secondary antibody.

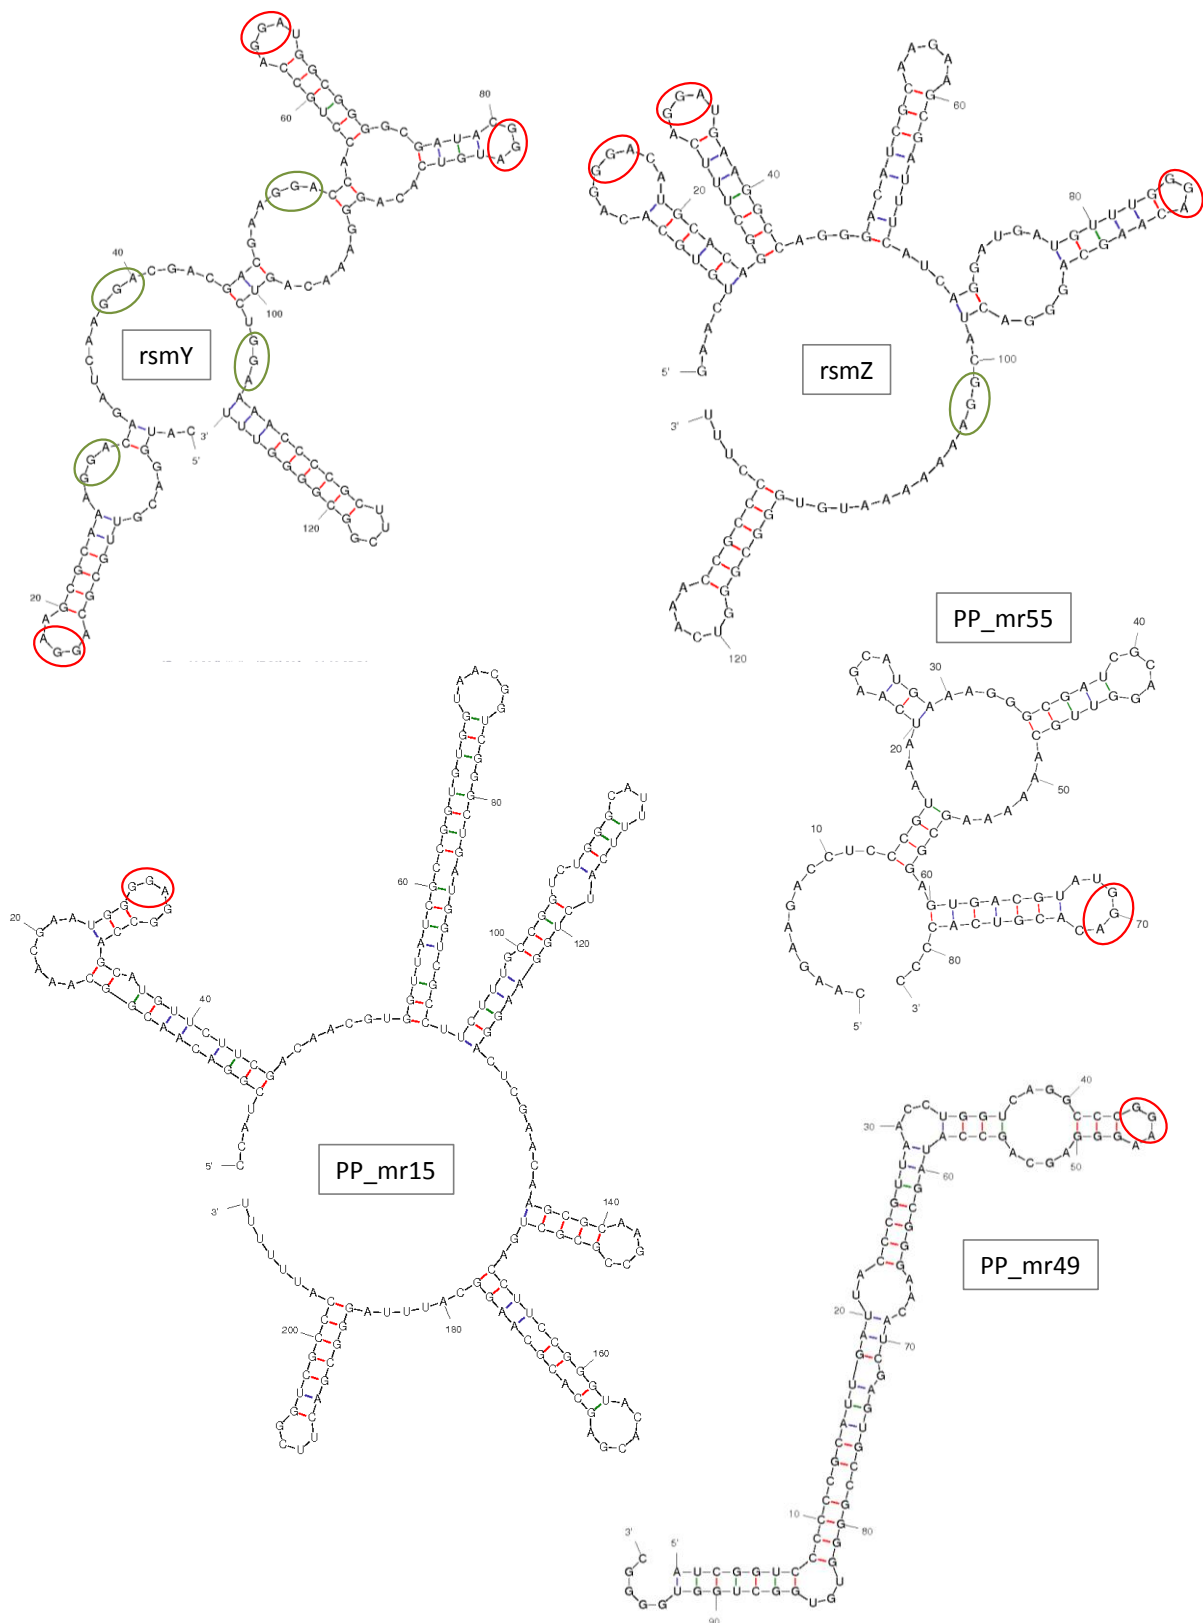

**Figure S3.** Secondary structure predictions for several ncRNAs of *P. putida*. Unpaired GGA motifs and those in stem-loop structures are indicated in green and red, respectively. Predictions were done using the Mfold web server (M. Zuker. Mfold web server for nucleic acid folding and hybridization prediction. *Nucleic Acids Res.* **31** (13), 3406-3415, 2003).

**TGTAAG--N<sub>6</sub>--CTTACA**

```

rsmY GAATGAATCTCCTGTGTAAGCTTTTCCTACACGACGTGGTGACTTTTCACC
rsmZ CCAGTAACATCGCGTGTAAGCCTTTGCTTACTCGTTGTGTAAGCTTTCATG
mr55 GCGTAGGAAGGGTCTGTAAGGATTTCTGGTAGCCGGTCATAGCGGTGTTGA

```

**Figure S4.** Putative GacA binding sites in the promoter regions of rsmY, rsmZ and PP\_mr55. Bases identical to the consensus (indicated above the sequences) are highlighted in yellow; additional ones conserved in the three sequences are highlighted in blue and those conserved in two of the sequences in grey.



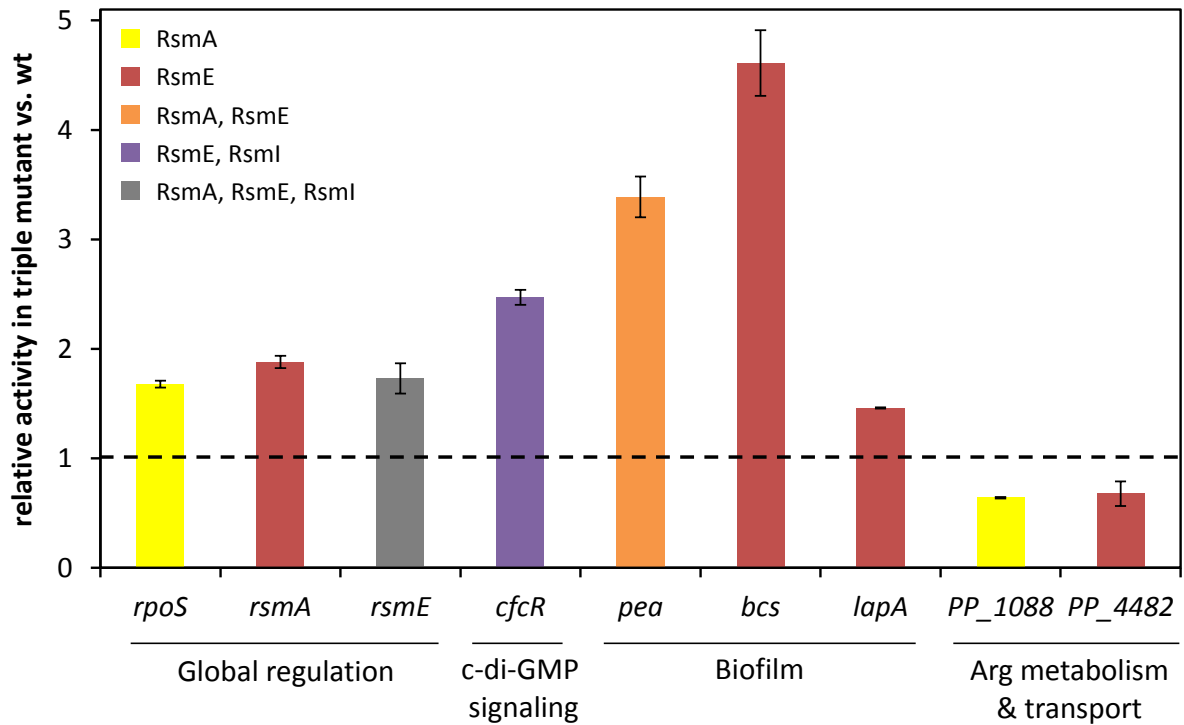

**Figure S5.** Influence of Rsm proteins on expression of some of the identified targets. Translation fusions to the reporter *'lacZ* were analyzed in KT2440 and the triple *rsm* mutant after 5h of growth. Data are presented as relative  $\beta$ -galactosidase activity in the mutant with respect to the wild type, and are averages and standard deviations of two independent experiments with three technical replicas each. A value of 1 (broken line) indicates that there is no difference between the two strains. Color codes indicate the Rsm protein(s) for which each RNA has been identified as target. Constructs have been described elsewhere (Martínez-Gil et al., 2010; Huertas-Rosales et al., 2016, 2017; Barrientos-Moreno et al., manuscript in preparation).

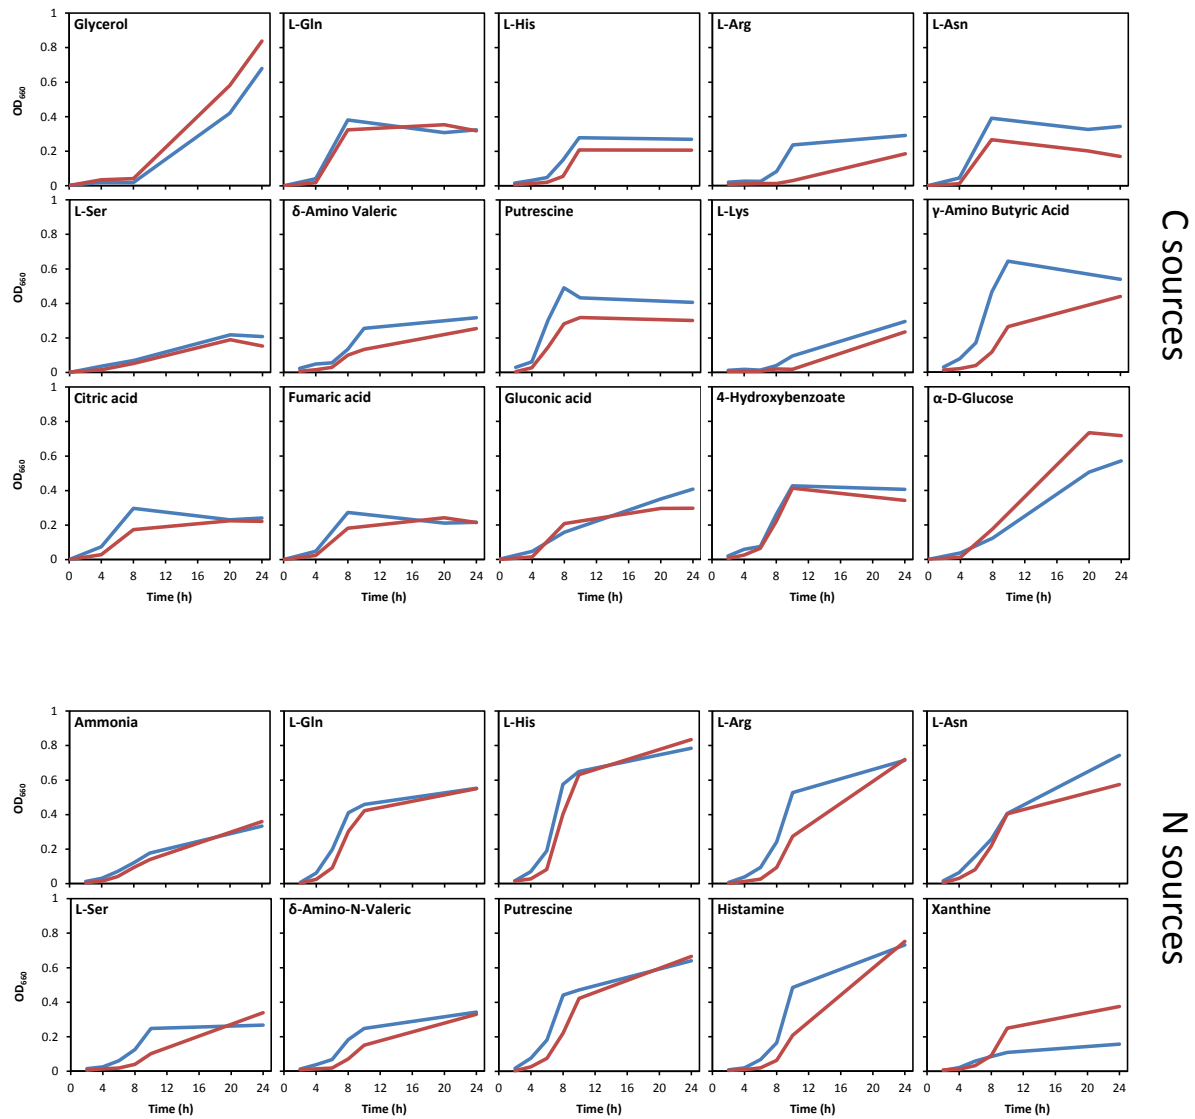

**Figure S6.** Growth of *P. putida* KT2440 (blue lines) and the triple *rsm* mutant (red lines) in BIOLOG plates during 24h of incubation at 30°C, with some of the compounds tested as sole source of carbon (top graphs) or nitrogen (bottom graphs).
